1 **Low-disturbance Farming Regenerates Healthy Deep Soil**

2 **towards Sustainable Agriculture**

3 Fangbo Deng<sup>1, 2#</sup>, Hongjun Wang<sup>3#</sup>, Hongtu Xie<sup>1#</sup>, Xuelian Bao<sup>1</sup>, Hongbo He<sup>1</sup>, Xudong

4 Zhang<sup>1</sup>, Chao Liang<sup>1\*</sup>

5 <sup>1</sup>Key Laboratory of Forest Ecology and Management, Institute of Applied Ecology, Chinese Academy of  
6 Sciences, Shenyang 110016, China

7 <sup>2</sup>University of Chinese Academy of Sciences, Beijing 100049, China

8 <sup>3</sup>Duke University Wetland Center, Nicholas School of the Environment, Duke University, Durham, NC  
9 27708, USA

10 \* Corresponding author: Chao Liang (Email: [cliang823@gmail.com](mailto:cliang823@gmail.com))

---

# These authors contributed equally to this work.

11 **Science for Society**

12 By 2050, how to feed 10 billion people on limited land without destroying the environment  
13 has become a global challenge. Prior research has shown that low- disturbance farming  
14 enhances biodiversity and natural biological processes in farmland topsoil, which benefit crop  
15 production. However, whether long-term low-disturbance farming could regenerate deep-soil  
16 health to meet sustainable intensification of crop production remains unclear. We evaluate the  
17 impact of low-disturbance practices on 3-meter soil profile after 10-year manipulations and  
18 provide an underneath mechanism on how long-term low-disturbance farming regenerate  
19 deep healthy soil. We found that low-disturbance farming not only promoted soil nutrient and  
20 water holding capacities, restored microbial diversity, richness, and ecological function in the  
21 whole 3-m soil profile, but also improved crop production (especially during drought) and  
22 potentially reduced energy consumption and greenhouse gas emissions, thus promoting  
23 sustainable agriculture and ensuring food and environment security.

24 **Summary**

25 Intensive conventional farming has degraded farmland topsoil and seriously threaten food  
26 and environment security globally. Although low-disturbance practices have been widely  
27 adapted to restore soil health, whether this measure in a long run can potentially recover the  
28 critical deep soil to meet sustainable intensification of crop production are still unclear. Here  
29 we compared soil microbiome, physiochemical parameters along 3-m deep soil profiles, and  
30 crop yield in Northeast China subjected to ten years of farming practices at 3 levels of  
31 disturbance, including conventional tillage (CT), no-tillage without stover mulching (NTNS),  
32 and no-tillage with stover mulching (NTSM). We found that low-disturbance practices  
33 (NTNS and NTSM) promoted the ability of the deep soil to retain water and nitrogen,  
34 regenerated whole-soil microbial diversity and function, and significantly improved corn  
35 yield in the drought year. This study implies that the low-disturbance practices could dig  
36 deeper for agricultural resource and reduce energy consumption and greenhouse gas  
37 emissions, thus regenerating highly efficient, sustainable agriculture.

38 **Graphical Abstract**

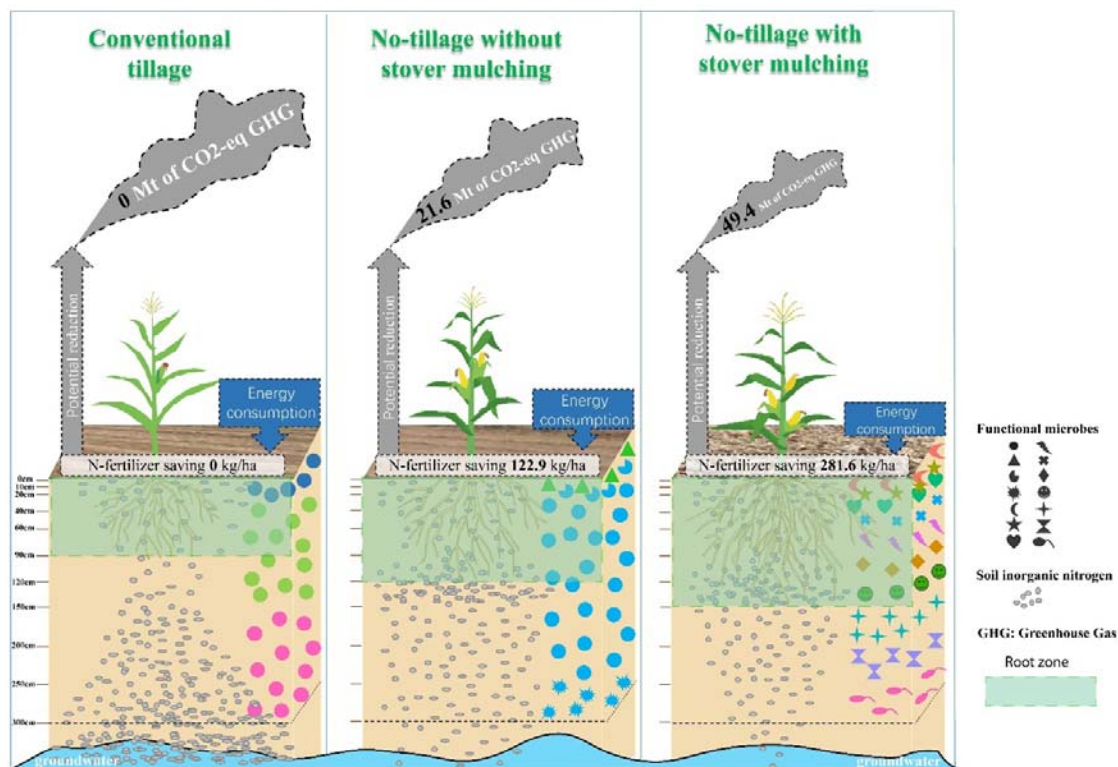

The simplified illustration shows the changes of soil inorganic nitrogen and microbes in the soil profile and the potential impact on the environment in a low-fertility trial in Northeast China. Similarity of microbial communities is indicated by the same color. The data in the dashed box indicates the predicted value

39

40 **Keywords:** Sustainable agriculture, no-tillage, stover mulching, microbial diversity and

41 function, deep-soil resource.

## 42 **Introduction**

43        Since the Industrial Revolution, the rate of soil carbon loss has increased dramatically,  
44 resulting in a global carbon debt due to agriculture of 116 Pg carbon for the top 2 m of soil<sup>1</sup>.  
45 The loss of soil carbon in farmlands has not only changed global climate but also produced  
46 catastrophic cascade impacts on global food and environment security, as soil carbon is the  
47 cornerstone for healthy and productive soil that will be needed to sustainably feed 10 billion  
48 people in 2050 (United Nations, World Population Prospects 2019). It is well known that  
49 intensive conventional farms with high energy inputs (chemical fertilizers) and disturbance  
50 (e.g. tillage/compaction, burn/remove stover) have caused a series of environmental issues,  
51 like water pollution, biodiversity loss, freshwater depletion and climate change<sup>2</sup>. Even worse,  
52 increasing the amount of chemical fertilizer is unlikely to continue the increase in quantity  
53 and quality of food products worldwide<sup>3</sup>, while the options to expand the farmland area at the  
54 expense of nature and biodiversity that already under pressure is limited<sup>4</sup>. Moreover, the  
55 topsoil disturbance, tillage in particular, prevents root growth into deeper soil<sup>5</sup>, thus critically  
56 minimizing the exploitation of deep soil profile<sup>6</sup> and reducing crop's nutrient using efficiency  
57 and its resilience to drought.

58        Since the 1970s, low-disturbance practices (e.g. reduced tillage, no-tillage and stover  
59 mulching) have been gradually applied to restore soil health and reduce non-point source  
60 pollution<sup>7</sup>. Growing evidence shows that no-tillage and stover mulching boosted top-soil  
61 organic carbon (SOC)<sup>8,9</sup>, increased soil aggregate stability<sup>10</sup> and reduced soil erosion and  
62 surface runoff<sup>11</sup>. All these benefits from low-disturbance practices are tied with complex  
63 microbial processes that interact with crops' fine roots and drive soil carbon transformation  
64 and stabilization<sup>12,13</sup>. Many crops' roots (depending on the species and management) can  
65 penetrate over one meter in depth, which means they can potentially forage for nutrient and  
66 water in deep soil and impact deep-soil microbes as well<sup>4,6,14</sup>. However, most studies by now

67 mainly focused on farmland topsoil or soils within 1-m depth<sup>15-17</sup>, and soil below 1 meter,  
68 which belongs to Earth's Critical zone, was often overlooked. Studies in natural ecosystem  
69 indicate roots in deep soils (> 1 m) can not only promote the absorption of deep nutrients and  
70 water for plant growth, reduce nutrient losses, but also have effects on deep soil microbial  
71 community<sup>4,14,18</sup>, although observing and measuring deep roots remain methodological  
72 challenging<sup>4,14</sup>. More importantly, microbes inhabiting in the deep soils (> 1 m) may  
73 substantially impact long-term carbon sequestration, mineral weathering and crop  
74 production<sup>19-21</sup>, and play important roles in bridging aboveground vegetation with parent soils  
75 and even acts as an essential buffer protecting underground water<sup>22</sup>.

76 Recent research shows that corn belts in the U.S.A., western Europe, and China have  
77 experienced the most soil carbon loss globally<sup>1</sup>. The corn belt in Northeast China is  
78 considered as the “breadbasket” of the country, having the largest grain production and  
79 overlapping with the most fertile Mollisol region that sustains 3% of population in the  
80 world<sup>23</sup>, accounting for over 30% of corn production of China<sup>24</sup>. Here, a 10-year  
81 manipulative experiment was conducted at a temperate corn farm in Northeast China,  
82 investigating farming practices with three levels of disturbance:  
83 highdisturbance—conventional tillage (CT), low disturbance—no-tillage without stover  
84 mulching (NTNS) and lowest disturbance—no-tillage with 100% stover mulching (NTSM).  
85 We compared soil physiochemical properties, fine-root associated organic carbon, and  
86 microbial communities of the 3-m soil profiles at the end of dormant season after the 10-year  
87 manipulation, and multi-year corn yield as well. We aimed at testing whether the lowest  
88 disturbance practice—no-tillage with 100% stover mulching as a nature-based solution, close  
89 to undisturbed natural ecosystem, would regenerate healthy deep-soil with highly diversified  
90 and functional microbes over time toward a highly resilient, sustainable agricultural  
91 ecosystem.

## 92 **Results**

### 93 **Soil properties and corn yield**

94 Soil properties varied significantly among disturbance practices and at different soil  
95 depths (Fig. 1 and Table S1). The SOC, TN and C/N ratio substantially decreased from the  
96 soil surface to around 150 cm depths and then remained unchanged within 150-300 cm (Fig.  
97 1). The NTSM slightly increased SOC, TN and C/N ratio at 0-20 cm soil layers compared  
98 with the NTNS and the CT (Fig. 1 and Table S1). The NTSM and NTNS reduced soil pH in  
99 surface and deeper layers (Fig. 1d) and increased soil moisture at surface layers (0-60 cm)  
100 (Fig. 1e). In the CT plots, soil  $\text{NO}_3^-$ -N concentration first decreased and then increased  
101 remarkably, ranged from 4.19 to 23.32  $\text{mg kg}^{-1}$  (Fig. 1i). However, under the NTNS and  
102 NTSM treatments, soil  $\text{NO}_3^-$ -N decreased significantly at 0-40 cm then increased to the  
103 maximum at 120-150 cm. Interestingly, above 120-150 cm layer,  $\text{NO}_3^-$ -N was significantly  
104 higher with low-disturbance practices than conventional tillage, while the soil below 150 cm  
105 under low-disturbance practices had much lower  $\text{NO}_3^-$ -N compared to conventional tillage  
106 (Fig. 1i). The NTNS plots contained much higher amounts of ammonium than the CT and the  
107 NTSM plots (Fig. 1h). Soil salt-extractable organic carbon (SEOC)—a proxy for  
108 biotically-derived organic acid declined from the surface to 40-60 cm and then increase to its  
109 peak at 60-90 cm under CT, at 90-120 cm under NTNS and at 120-150 cm under NTSM (Fig.  
110 1b). As SEOC is a sensitive indicator of root depth and density<sup>6</sup>, we estimate that corn roots  
111 reached up to 60-90 cm, 90-120 cm and 120-150 cm under the CT, the NTNS and the NTSM,  
112 respectively, which is in line with reported corn root depths (~150 cm)<sup>5,25</sup>. The NTSM  
113 increased the SEOC concentration at almost all soil layers compared with the CT and the  
114 NTNS (Fig. 1b), in which at the surface and 120-150 cm depth the contents of SEOC with  
115 NTSM were twice higher than CT. The increased SEOC in deep soils under NTSM reduced  
116 soil pH as shown by a significant negative relationship between SEOC and pH ( $r=-0.678$ ,

117  $p < 0.05$ ). The relative contributions of SEOC to SOC (SEOC/SOC) in the NTSM were also  
118 always higher than in the CT and NTNS (Fig. 1c). Based on the estimated root depths and  
119 soil bulk density, total soil inorganic nitrogen available for the coming growing season in the  
120 NTSM and the NTNS was approximate 427.34 and 352.34 kg ha<sup>-1</sup>, respectively, while only  
121 179.63 kg ha<sup>-1</sup> in conventional tillage.

122 The mean annual corn yield (2013-2016) in the NTSM is 13416.8 kg/ha, which is much  
123 higher than the CT and NTNS (Fig. 2), particularly during the drought year of 2015, with  
124 only 409.6 mm of rainfall during the growing season (about 100 mm lower than the mean  
125 rainfall), while the corn yield in NTSM is 36.4% and 22.3% higher than the CT and NTNS,  
126 respectively (Fig. 2).

### 127 **Microbial diversity, composition, and structure.**

128 The microbial richness (Chao1), observed number of species (Observed-species) and  
129 diversity (Shannon-Index) first increased within 0-20 cm and decreased from 20 to 90 cm,  
130 then increased hereafter (Fig. 3). The low-disturbance practices significantly increased Chao1,  
131 Observed-species and Shannon-Index, particularly in 0-40 cm soil depths (Fig. 3). There  
132 were 54 microbial phyla across all soil samples. The dominant phyla (relative abundance > 1%  
133 across all soil samples) were Proteobacteria, Actinobacteria, Chloroflexi, Acidobacteria,  
134 Nitrospirae, Gemmatimonadetes, Planctomycetes, and these phyla accounted for 60-91% of  
135 the total microbial abundances in the whole soil profile (Fig. S1a). Bacteroidetes,  
136 Verrucomicrobia, Latescibacteria, Parcubacteria, Firmicutes, Microgenomates and  
137 Saccharibacteria were less dominant (relative abundance > 0.1% across all soil samples) but  
138 were still found across all soil samples (Fig. S1a). Although no difference in the composition  
139 of dominant phyla among treatments was found, there were more non-dominant phyla with  
140 higher relative abundance in low disturbance practices than conventional tillage practice (Fig.  
141 S1b).



142 Indicator analysis identified 16 and 51 clearly classified genera (relative abundances >  
143 0.005%) in the NTNS and the NTSM plots, respectively, while no indicator genera were  
144 found in the conventional tillage plots (Fig. 4 and Table S2). The indicator genera in the  
145 NTNS plots belonged to Proteobacteria, Actinobacteria, Chloroflexi, Gemmatimonadetes and  
146 Planctomycetes, and most of them appeared in the surface soil (0-20 cm) with only 1 genus  
147 below 150 cm. Importantly, more extra indicator genera — including Bacteroidetes,  
148 Acidobacteria, Deferribacteres, Firmicutes, Verrucomicrobia, Chlorobi and Spirochaetae —  
149 existed in the NTSM plots, in which under 150 cm we observed 7 genera (Fig. 4 and Table  
150 S2).

151 Microbial community structures were visualized by Non-metric multidimensional scaling  
152 (MDS) and tested by PERMANOVA based on Bray–Curtis. The microbial communities  
153 among treatments in the root zones were marginally different (PERMANOVA  $p=0.08$ );  
154 however, below the root zone they differed distinctively (PERMANOVA  $p=0.02$ ). The  
155 disturbance practices influenced the vertical distribution dissimilarity in microbial  
156 community structure (Fig. 5). Three clusters — 0-10 cm and 10-20 cm, 20-150 cm and  
157 150-300 cm — were observed in the CT plots (PERMANOVA- $F=9.57$ ,  $p=0.0001$ ) (Fig. 5). In  
158 the NTNS plots, 0-10 cm formed an independent cluster, while other soil depths showed  
159 some separation (e.g. 20-120 cm were separated from 150-300 cm soil depths by axis 1);  
160 however, Bray-Curtis distances between adjacent depths were too close to be separated  
161 (PERMANOVA- $F=8.18$ ,  $p=0.0001$ ) (Fig. 5). The NTSM treatment clustered 0-10 cm and  
162 10-20 cm together, 120-150 cm, 150-200 cm, 200-250 cm and 250-300 cm separately, and the  
163 other depths show some separations as well (PERMANOVA- $F=11.32$ ,  $p=0.0001$ ) (Fig. 5).

#### 164 **Predicted Ecological functions of microbial communities.**

165 According to the results of microbial diversity, composition and structure, the metabolic  
166 capabilities of microbial community in the whole 3-m soil profiles were predicted using

167 Tax4Fun (Fig. S2). Results showed that low-disturbance practices significantly increased the  
168 abundance of predicted functions related to carbohydrate metabolism, nucleotide metabolism,  
169 glycan biosynthesis and metabolism, lipid metabolism and metabolism related to cofactors  
170 and vitamins (Fig. S2a). Moreover, the relative abundances of genes encoding for  
171 assimilatory nitrate reduction in low-disturbance practices were higher than that in  
172 conventional tillage practice (Fig. S3). The results suggested that in low disturbance practices,  
173 microbial community prefer to convert the nitrate/nitrite to ammonia. We then further  
174 assessed the impact of stover mulching on functional profiles (Fig. S2b). The extended error  
175 bar plot shows that the NTNS enriched the abundance of amino acid metabolism and lipid  
176 metabolism, while the NTSM enriched the functions associated to energy metabolism,  
177 carbohydrate metabolism, biosynthesis of secondary metabolites, glycan biosynthesis and  
178 metabolism as well as metabolism of cofactors and vitamins (Fig. S2b).

### 179 **Relationships between microbial communities and soil properties**

180 Forward selection in Redundancy analysis (RDA) revealed that soil depth (pseudo-F=48, p=  
181 0.002), SOC (pseudo-F=11.5, p= 0.002), SM (pseudo-F=3.4, p= 0.012), soil pH  
182 (pseudo-F=2.3, p=0.018) and soil  $\text{NH}_4^+$ -N (pseudo-F=2.7, p= 0.026) significantly affected the  
183 vertical distribution of microbial communities (Fig. S4). Furthermore, the soil properties that  
184 regulated the distribution of soil microbes were different under different disturbance practices.  
185 Under the CT treatment, soil microbial community was mainly affected by soil  $\text{NH}_4^+$ -N  
186 (pseudo-F=4, p= 0.002) and soil  $\text{NO}_3^-$ -N (pseudo-F=2.3, p= 0.012) that mainly came from  
187 applied fertilizer (Fig. 6). The microbial community positively correlated to soil  $\text{NH}_4^+$ -N in  
188 the 0-20 cm soil, to soil  $\text{NO}_3^-$ -N negatively within 20-150 cm, while to soil  $\text{NO}_3^-$ -N positively  
189 after 150 cm (Fig. 6). Under the NTNS treatment, soil pH (pseudo-F=3.7, p=0.004)  
190 constrained the distribution of the microbial community, in which strong negative  
191 correlations occurred in 0-10 cm soil and a positive correlation in 90-150 cm (Fig. 6). Under

192 the NTSM treatment, soil TN (pseudo-F=11, p=0.002), SM (pseudo-F=2.6, p=0.004) and C/N  
193 ratio (pseudo-F=1.8, p=0.016) significantly influenced the soil microbial community  
194 separation (Fig. 6). In general, the microbes positively correlated with the soil TN and C/N  
195 ratio in the surface soil layers (0-40 cm) and with SM in the middle layers (40-150 cm), while  
196 they were mainly influenced by depth in the deeper soil (150-300 cm) (Fig. 6).

## 197 **Discussion**

### 198 **No-tillage practices promote deep-soil health and corn yield.**

199 Plant roots, fine roots in particular, release large amounts of labile organic carbon<sup>26</sup> that are  
200 essential for healthy microorganisms in soil. Generally, most studies considered that fine  
201 roots are roots < 2mm in diameter, while roots <0.2 mm in diameter can contribute to >50 %  
202 of the overall root length and play a major role in releasing root exudates and absorbing  
203 nutrients and waters<sup>14</sup>. Currently the measurement of fine roots with diameter less than 0.2  
204 mm are still technically difficult and their high turnover rates *in-situ* make the measurement  
205 even more complex<sup>14</sup>. To minimize the root-turnover effects to the most degree, we collected  
206 soil samples at the end of dormant season, which can likely mirror the long-term legacy  
207 effects of our practices. Also instead of detecting fine roots directly, we measured soil  
208 salt-extractable organic carbon (SEOC)—a proxy for biotically-derived organic acid, which is  
209 a sensitive signal of root density and could be an indicator of root depth<sup>6</sup>. Our results show  
210 that no-tillage promotes root growth into deep soil, up to 150 cm in the NTSM. The root  
211 exudates with various organic acid and dead roots likely contributed to the lower soil pH in  
212 the NTNS and the NTSM, which in turn increased mineral weathering<sup>6</sup> and diversified the  
213 microbial communities with multi-ecological functions. The increased fine roots in deeper  
214 soil retained more nutrients including nutrients in dead roots and converting nitrate to more  
215 stable ammonium (Fig. S3) and also provided labile carbon (Fig. 1b) to remove leaked nitrate  
216 through denitrification in deeper soil (below 1.5 m), where higher relative abundance of the

217 denitrification bacteria (*Pseudomonas* and *Caldithrix*)<sup>27,28</sup> (Fig. 4 and Table. S2) and  
218 denitrification genes (Fig. S3) were detected in low disturbance practices — particularly in  
219 NTSM. However, shallower roots in the CT treatment can't provide enough labile carbon to  
220 remove extra soil NO<sub>3</sub><sup>-</sup>-N in deep soil, thus causing nitrite accumulation and leaching into  
221 deeper soil layers. The amount of inorganic nitrogen accumulated in the root zones under  
222 NTSM (427.34 kg ha<sup>-1</sup>) likely could provide plenty of nitrogen for corn growth in the coming  
223 growing season (Fig. 2), based on the removed nitrogen in the grain (~200 kg ha<sup>-1</sup>).  
224 Additionally, in line with many studies that show stover mulching reduces water evaporation  
225 and surface runoff and increase soil moisture in top soils<sup>11,29</sup>, we found that the soil moisture  
226 was significantly higher in the NTSM than in the CT plots. Therefore, no-tillage with stover  
227 mulching not only restores soil health by increasing the holding capacities for nutrients and  
228 water, thus reducing energy input to farm, but also tended to reduce the risk of nitrate  
229 leaching into groundwater. And more importantly, the healthy deep soil in turn raises corn  
230 production and promote the crop resistance to drought (Fig. 2). All these are critical to the  
231 development of sustainable agriculture and the associated ecosystems.

232 **No-tillage with stover mulching promotes microbial diversity, richness, and ecological**  
233 **function contributing to sustainable farming.**

234 Under the CT treatment, tillage heavily disturbed the topsoil and liberated occluded organic  
235 materials. Microbes tended to rapidly use available nutrients in the plowed layer (e.g.  
236 NH<sub>4</sub><sup>+</sup>-N)<sup>30</sup>, thereby causing the reduction of microbial metabolic diversity (Fig. S2a). Then,  
237 the resistance of the soil to stress or disturbance may also decrease<sup>31</sup>. In deeper soil layers,  
238 due to shallower roots, NO<sub>3</sub><sup>-</sup>-N could quickly move downward and accumulate in deeper soil  
239 (Fig. 1i), which not only contaminated the underground water but also limited the activity of  
240 non-dominant microbes with important ecological functions, as no indicator genera were  
241 identified for each soil depth in CT treatment (Fig. 4 and Table S2). Because the microbial

242 communities were closely associated with inorganic nitrogen, the microbes under CT were  
243 mainly influenced by added chemical fertilizer<sup>32</sup>. Although the dominant microbial  
244 communities in CT were similar to those in the NTNS and NTSM, the loss of function  
245 resulted from the difference of non-dominant microbes, indicating that the soil under CT had  
246 degraded.

247 Under the NTNS treatment, soil pH was the major edaphic factor affecting the microbial  
248 community and the indicator genera (Fig. 6 and Table S3). The lower soil pH possibly was  
249 caused by deeper roots as shown by higher SEOC that is generally positively related to root  
250 density<sup>6</sup>. Soil pH is often observed as a major factor determining the microbial composition  
251 and structure in natural ecosystems<sup>33,34</sup>, as microbes often show a narrow tolerance to soil pH.  
252 In addition, soil pH regulates the availability of nutrient and mitigate ion toxicity<sup>33-35</sup>. Under  
253 NTNS, soil pH and depth explained 35% distribution of the microbial community (Fig. 6).  
254 We speculated that other edaphic factors (e.g. salinity and iron) directly or indirectly related  
255 to soil pH and SEOC also influenced the changes in the microbial community.

256 Under NTSM treatment, TN and C/N significantly correlated with soil microbial  
257 community due to the high C/N ratio of stover and roots (Fig. 6). Prior studies have reported  
258 that, following maize stover mulching, more organic N, amino acid N, and amino sugar N  
259 were observed in soil<sup>36,37</sup>, which increased the retention time of nitrogen, hence meeting the  
260 nutrient requirement of corn growth and reducing nitrate loss to underground water. The  
261 increased available nitrogen, labile carbon and water in deep soil under NTSM can increase  
262 the resilience and resistance of maize to disturbances with higher grain production (Fig. 2).  
263 Zhang et al.<sup>38</sup> also observed litter-covered soil showed greater resistance to heating and  
264 copper addition due to the changes in soil properties and microbial community structure.  
265 Resistance to disturbance or stresses is the nature of a healthy soil and is essential for  
266 maintaining ecosystem functions, such as decomposing organic matter<sup>38,39</sup>. Under the NTSM

267 treatment, the microorganisms associated with the degradation of relatively stable carbon  
268 compounds, such as Planctomycetes and Verrucomicrobia (Table S4)<sup>40,41</sup> as well as the  
269 indicator *Cellulomonas* and *Azospirillum* (Fig. 4 and Table S2) with the function of cellulose  
270 decomposition<sup>42,43</sup> were increased. The predicted functional profiles related to energy  
271 metabolism (Carbon fixation pathways in prokaryotes), carbohydrate metabolism (TCA cycle,  
272 amino sugar, nucleotide sugar, galactose, fructose), biosynthesis of secondary metabolites  
273 (Carotenoid and Betalain) and glycan biosynthesis were increased, suggesting a higher  
274 metabolic activity and a change in substrate quality (Fig. S2). In addition, stover mulching  
275 also increased the ecological filter function of soil depth for selecting microbial communities  
276 as more indicator genera of each soil depths were identified under NTSM compared to NTNS  
277 and CT practices (Fig. 4 and Table S2). And these indicators residing at different soil depths  
278 might enhance the anti-disturbance ability of NTSM. For example, denitrification bacteria  
279 *Caldithrix* and *Pseudomonas*<sup>27,28</sup> were the indicator genera of 150-200 cm and 250-300 cm,  
280 respectively (Fig. 4 and Table S2), which might explain the low nitrate in the deep soil in  
281 NTSM. *Ignavibacteria* and *Spirochaeta*, the indicator genera of deep soil, have the ability to  
282 grow under the conditions of strictly anaerobic<sup>44</sup> and severely limited nutrients<sup>45</sup>, respectively.  
283 Surface indicator genera belonging to Bacteroidetes might have the ability to degrade organic  
284 matter that is difficult to decompose<sup>46</sup>.

### 285 **Implications for climate change and food security.**

286 It was observed that about 179.63, 352.34 and 427.34 kg ha<sup>-1</sup> inorganic N were kept in the  
287 root-zone soil in the CT, NTNS and NTSM, respectively. Generally, corn roots reach their  
288 maximum depth at the silking stage<sup>47</sup>, which is also the time when the heaviest rainfall occurs  
289 in northeastern China. We therefore expect that the available N kept in the root zone would be  
290 utilized by crops in the coming growing season before the storm leach the nitrogen down to  
291 ground water, which means that fertilizer N could be cut to meet crop growth in, at least,

292 Northeast China and also prevent reactive N losses. Since the nitrogen use efficiency (NUE)  
293 of maize system under the conventional management is 51% in northeast China (NUE is  
294 defined as the efficiency of fertilizer N transferring to harvested crop N)<sup>48</sup>. Then, we  
295 conservatively calculate the required fertilizer N in the next year based on two assumptions: 1)  
296 the NUE of soil available N in root zone is equal to that NUE of applied fertilizer N, both of  
297 them are 50%; 2) the mineralized N during the coming growing season is neglected. Thus, N  
298 supply requirement = Fertilizer N×NUE + N in root zone ×NUE + Stover-N, where Stover-N  
299 for NTSM is 60 kg ha<sup>-1</sup>. We estimated the N requirement for each disturbance practice by  
300 multiplying grain yield by grain N concentration (1.4%)<sup>48</sup> plus multiplying stover yield by  
301 stover N concentration (0.8%)<sup>49</sup>. For CT, NTNS and NTSM, the mean annual corn yields  
302 were 10946.74, 12487.81 and 13416.81 kg ha<sup>-1</sup>, and the stover yields were 966.67, 10083.33  
303 and 10833.33 kg ha<sup>-1</sup>, respectively. Thus, the N requirements were 230.6, 255.5 and 274.5 kg  
304 ha<sup>-1</sup> for CT, NTNS and NTSM, respectively. Therefore, the theoretically conservative  
305 amounts of fertilizer N in the coming growing season are 281.6, 158.7 and 1.7 kg ha<sup>-1</sup> for CT,  
306 NTNS and NTSM, respectively. No fertilizer-N is needed to apply without reducing corn  
307 yield in the NTSM plot. Compared to CT, the NTNS and NTSM could at least save  
308 respectively about 122.9 and 281.6 kg ha<sup>-1</sup> N-fertilizer. For every kilogram of fertilizer-N  
309 produced and used on cropland, up to 87.9 MJ of energy is consumed<sup>50</sup> and 13.5 kg of  
310 CO<sub>2</sub>-equivalent (eq) (CO<sub>2</sub>-eq) is emitted<sup>51</sup>. Hence, totally 24,752.6 MJ of energy  
311 consumption could be reduced and 3,801.6 kg CO<sub>2</sub>-eq emission could be cut per hectare  
312 cornland in Northeast China at least by using NTSM tillage practice. If this could be applied  
313 to all maize farmland in Northeast China (13,000,000 ha, Source: China Statistics Yearbook  
314 2018), 0.3 EJ of energy could be saved and 49.4 Mt of CO<sub>2</sub>-eq could be reduced. Based on  
315 the average annual energy consumption for households of China in 2017 (15 EJ, China  
316 Statistics Yearbook 2018) and CO<sub>2</sub> emissions (9,839 Mt, Global Carbon Atlas), the NTSM

317 practice in corn farming of Northeast China has the potential to save 2% of household energy  
318 and to reduce 0.5% of CO<sub>2</sub> emissions each year in the whole country..

319 Our results, particularly higher SEOC content, microbial diversity, and indicator genera in the  
320 NTSM deep soil compared with CT, clearly showed that low-disturbance practices can dig  
321 deeper for agricultural resource over time. This indicates that crops, like corn in this study,  
322 under appropriate management can ultimately explore nutrients and water from deeper soil,  
323 thus not only increasing the volume of soil (almost double in this study) exploited without  
324 reclaiming more natural land areas but also reducing nutrient loss into ground water.  
325 Meanwhile, the input of labile carbon including SEOC into deeper soil in the NTSM provides  
326 essential energy and nutrients to microbes and gradually shape highly diversified and  
327 functional microbial communities in the deep soil over time, and hence improve the  
328 self-sustaining ability of farmland in the face of climate change. The improvements of  
329 microbial communities in the deep soil (1-3 m) at the end of dormant season in our study  
330 provide evidence for the first time that a nature-based management in farmland is conducive  
331 to deep-soil health for sustainable farm in a long run. Although many scientists have realized  
332 the importance of deep rooting for sustainable intensification of crop production<sup>4,14</sup>, the  
333 deep-root studies are still rare due to technological bottleneck. We did a literature review on  
334 whether no-tillage and straw mulching extend root depth in other crops (Fig. S5) as roots are  
335 the driver for these changes. However, we can't find root-depth studies including both  
336 no-tillage and straw mulching. In these studies, no-tillage as a conservative management  
337 increases root depth by 23 cm, 39 cm and 14 cm in corn, wheat, and sunflower, respectively.  
338 While some studies also show no effects or even reduce root depth<sup>52,53</sup>, the possible reason is  
339 the legacy effects of tillage, for example, long-term no-tillage leads to soil compaction, and  
340 the soil system might be still in its transition stage. Coupled with our results, therefore,  
341 low-disturbance practices as a nature-based agricultural management likely can develop a



342 deeper root system to explore more resource in deep soil to sustain food production.

### 343 **Conclusion**

344 According to ecological theory<sup>54,55</sup>, microbial community assembly in the CT treatment  
345 was mainly based on deterministic processes and significantly influenced by environmental  
346 stress and fertilizer nitrogen. Stover mulching might alter these processes through deeper  
347 roots affecting the vertical heterogeneity in resource availability<sup>5</sup>. When energy resources are  
348 richer in the soil, environmental stress tend to alleviate<sup>56</sup>, and higher biodiversity was caused  
349 due to more stochastic processes introduced in community assembly<sup>57</sup>. In view of the  
350 importance of microbial community assembly in predicting ecosystem service functions, our  
351 results provide underneath evidence that lowest-disturbance practice—no-tillage with stover  
352 mulching promotes deep-soil health to cope with environmental stress through increasing  
353 water and nutrient holding capacity, microbial richness, microbial diversity and ecological  
354 functions, building up sustainable intensification of crop production. Therefore, no-tillage  
355 with stover mulching is recommendable to be applied more generally to other crops globally  
356 and might provide a nature-based measure to ensure the global food demand while without  
357 threatening environmental security and reclaiming more lands.

### 358 **Experimental Procedures**

#### 359 **Site description and soil sampling.**

360 The field experiment was established in 2007 at the Lishu Conservation Tillage Research and  
361 Development Station of the Chinese Academy of Sciences in Jilin province, Northeast China  
362 (43.19° N, 124.14° E). The region has a humid continental climate with a mean annual  
363 temperature of 6.9 °C and the mean annual precipitation of 614 mm. The soils are classified  
364 in the Mollisol order (Black Soil in Chinese Soil Classification) with a clay loam texture<sup>58</sup>.  
365 The site has been continuously planted with maize since 2007. We set up an experiment by a

366 randomized complete block design with four replicates and five treatments. Each plot area  
367 was 261m<sup>2</sup> (8.7×30m). The five treatments included conventional tillage (moldboard plowing  
368 to a depth around 30 cm and removed the stover), no-tillage (no soil disturbance and direct  
369 seeding), and no-tillage with three-level stover mulching (33%, 67% and 100% newly  
370 produced maize stover were evenly spread over the soil surface each fall). For each treatment,  
371 slow-release fertilizer was applied at one time when sowing, which was equal to 240 kg/ha N;  
372 47 kg/ha P; 90 kg/ha K. The rainfall data were obtained from local meteorological  
373 administration. The grain yield was estimated by manually harvesting 20 m<sup>2</sup> area, randomly  
374 taken from each plot.

375 In this experiment, in order to reduce the damage to the plots and reduce costs, 3 plots  
376 were randomly taken from each treatment including conventional tillage (CT), no-tillage  
377 without stover mulching (NTNS), no-tillage with 100% stover coverage (NTSM) as three  
378 comparative practices. In April 2017, triplicate soil cores (0-300 cm) were collected from  
379 each plot at the end of dormant season. After removing surface stover, we took soil cores by a  
380 stainless-steel hand auger and sliced each into ten layers: 0-10 cm, 10-20 cm, 20-40 cm,  
381 40-60 cm, 60-90 cm, 90-120 cm, 120-150 cm, 150-200 cm, 200-250 cm, 250-300 cm. In total,  
382 90 soil samples were collected and transported to the laboratory within 3 hours, then passed  
383 through a 2-mm sieve. All visible roots, crop residues and stones were removed. Each soil  
384 sample was divided into three subsamples: one subsample for DNA extraction and soil  
385 salt-extractable organic carbon (SEOC) measurement that was immediately placed into a  
386 polyethylene plastic bag and stored at -80 °C, one for chemical measurements including  
387 ammonium nitrogen (NH<sub>4</sub><sup>+</sup>-N) and nitrate nitrogen (NO<sub>3</sub><sup>-</sup>-N) (within one day), and the  
388 remaining one was air dried for other soil physicochemical properties.

### 389 **Soil properties**

390 Soil total nitrogen (TN) content was measured by an Element analyzer Vario EL III

391 (Elementar Analysensysteme GmbH, Hanau, Germany). Soil organic carbon (SOC) was  
392 converted from soil organic matter that was measured by potassium dichromate oxidation<sup>59</sup>.  
393 Soil pH was measured in deionized free-CO<sub>2</sub> water (1:2.5 w/v). Gravimetric soil moisture  
394 was determined by oven-drying fresh soil to a constant weight at 105 °C. Soil NH<sub>4</sub><sup>+</sup>-N and  
395 NO<sub>3</sub><sup>-</sup>-N were extracted from fresh soil by 2 M KCl and measured by a continuous flow  
396 analytical system (AA3, SEAI, Germany). To reflect soil soluble, exchangeable,  
397 mineral-bound OC, SEOC was extracted from the frozen soil samples with 0.5 M K<sub>2</sub>SO<sub>4</sub> (1:5  
398 w/v)<sup>60,61</sup>.

### 399 **DNA extraction, PCR amplification and pyrosequencing**

400 Soil DNA was extracted from the frozen soil samples (0.5 g wet weight) by using MoBio  
401 PowerSoil DNA isolation kit (MoBio Laboratories, Carlsbad, CA, USA) following the  
402 instructions of the manufacturer. The quality of DNA was determined by 1% agarose gel  
403 electrophoresis. The V3–V4 region of the bacterial 16S rRNA gene was amplified by PCR  
404 using the primers 338F and 806R with barcode for Illumina MiSeq sequencing. PCR was  
405 performed in a total volume of 50 µl containing 30 ng DNA as a template, 20 mol of each  
406 primer, 10mM dNTPs, 5 µl 10× Pyrobest buffer and 0.3 U of Pyrobest polymerase (Takara  
407 Code: DR005A). Each sample was amplified for three replicates. The PCR products from the  
408 same sample were pooled, checked by 2% agarose gel electrophoresis and were then purified  
409 using AxyPrepDNA agarose purification kit (AXYGEN). Finally, purified PCR products  
410 were sequenced on an Illumina MiSeq platform PE300 sequencer (Illumina, USA).

411 The raw sequence data were further analyzed by the following protocol. Low-quality  
412 sequences with an average quality score of less than 20 were filtered by employing  
413 Trimmomatic<sup>62</sup>. The FLASH software was used to merge overlapping ends and treat them as  
414 single-end reads<sup>63</sup>. The non-amplified region sequences, chimeras and shorter tags were also  
415 removed using Usearch and Mothur<sup>64</sup>. The resulting high-quality sequences were clustered

416 into Operational Taxonomic Units (OTUs) at 97% sequence similarity using Usearch  
417 (Version 8.1.1861 <http://www.drive5.com/usearch/>). OTUs were then classified against the  
418 Silva (Release119 <http://www.arb-silva.de>) database and the taxonomic information of each  
419 OTU representative sequence was annotated using the RDP Classifier <sup>65</sup>. A total of 3,255,693  
420 high-quality reads were obtained from all soil samples, which were clustered into 9,573  
421 unique OTUs at a 97% sequence similarity. The Good's coverage of all the samples ranged  
422 from 0.93 to 0.98, which indicates an adequate level of sequencing to identify the majority of  
423 diversity in the samples.

#### 424 **Statistical analyses**

425 Soil properties were analyzed and plotted using Sigmaplot 12.5 software. Alpha  
426 diversity indices were calculated in Qiime (version v.1.8) and used to reflect the diversity and  
427 richness of the microbial community in different samples. The relative abundances of  
428 individual phyla in different samples were computed by R packages. The indicator analysis  
429 based on genera-specific to each soil depth was conducted using indicpecies package of R  
430 with 9999 permutations, and the P-values were corrected for multiple testing using qvalue  
431 package of R<sup>66</sup>. Functional profiles of the microbial community were predicted by Tax4fun  
432 (an open-source package in R)<sup>67</sup> and further statistical analysis was conducted by STAMP  
433 using Welch's t-test <sup>68</sup>. Non-metric multidimensional scaling (MDS) was performed by  
434 "vegan" package of R to describe differences in microbial community structure among  
435 samples. Permutational multivariate analysis of variance (PERMANOVA) was employed on  
436 Bray-Curtis distances to test the differences in soil microbial communities among various  
437 sample groups. The redundancy analysis (RDA, Canoco 5 software) were conducted to  
438 identify the correlations between microbial community composition and environmental  
439 variables. ANOVA were conducted by SPSS Version 22. Percentage data were transformed  
440 using arcsine square root function before ANOVA test. All statistical tests were significant at

441  $p \leq 0.05$ .

#### 442 **Acknowledgements**

443 We would like to thank Dr. William H. Schlesinger at the Cary Institute of Ecosystem Studies  
444 for his comments and Dr. Randy Neighbarger at Duke University for language editing. This  
445 work was supported by the “National Key R&D Program” (No. 2016YFD0800103, No.  
446 2016YFD0200307) and the National Natural Science Foundation of China (grant number,  
447 41671297). We would like to thank Pengshuai Shao, Xuesong Ma and many individuals for  
448 assistance with sample collection, processing and analysis.

#### 449 **Author Contributions**

450 H.X., XZ and C.L. designed the experiment, F.D. did field and lab measurements, F.D., H.W.  
451 and C.L analyzed data and wrote the manuscript, and all the authors discussed results and  
452 commented on the manuscript.

#### 453 **Declaration of Interests**

454 The authors declare no competing interests.

#### 455 **Sequence availability**

456 All sequencing data that support the findings of this study have been deposited in the  
457 National Center for Biotechnology Information (<https://www.ncbi.nlm.nih.gov/>), in the  
458 Sequence Read Archive (SRA) database (BioProject number: PRJNA488172).

#### 459 **Supporting information**

460 Supporting information may be found online in the Supporting Information section at the end  
461 of the article.

#### 462 **References**

- 463 1 Sanderman, J., Hengl, T. & Fiske, G. J. Soil carbon debt of 12,000 years of human  
464 land use. *Proc. Natl. Acad. Sci. U.S.A.* **114**, 9575-9580 (2017).
- 465 2 Congreves, K., Hayes, A., Verhallen, E. & Van Eerd, L. Long-term impact of tillage  
466 and crop rotation on soil health at four temperate agroecosystems. *Soil Tillage Res.*  
467 **152**, 17-28 (2015).
- 468 3 Vitousek, P. M. *et al.* Nutrient imbalances in agricultural development. *Science* **324**,  
469 1519-1520 (2009).
- 470 4 Thorup-Kristensen, K. *et al.* Digging Deeper for Agricultural Resources, the Value of  
471 Deep Rooting. *Trends Plant Sci.* **25**, 406-417, doi:10.1016/j.tplants.2019.12.007  
472 (2020).
- 473 5 Kemper, W. D., Schneider, N. N. & Sinclair, T. R. No-till can increase earthworm  
474 populations and rooting depths. *J. Soil Water Conserv.* **66**, 13A-17A (2011).
- 475 6 Billings, S. A. *et al.* Loss of deep roots limits biogenic agents of soil development that  
476 are only partially restored by decades of forest regeneration. *Elem Sci Anth* **6**, 34  
477 (2018).
- 478 7 Salem, M. A. *Economics of reduced tillage technology on soil conservation and risk*  
479 *analysis for Eastern Oklahoma farmers*, Oklahoma State University, (1983).
- 480 8 Blanco-Canqui, H. & Lal, R. No-tillage and soil-profile carbon sequestration: An  
481 on-farm assessment. *Soil Sci. Soc. Am. J.* **72**, 693-701 (2008).
- 482 9 Liu, C., Lu, M., Cui, J., Li, B. & Fang, C. Effects of straw carbon input on carbon  
483 dynamics in agricultural soils: a meta-analysis. *Glob. Chang. Biol.* **20**, 1366-1381  
484 (2014).

- 485 10 Song, K. *et al.* Effects of tillage and straw return on water-stable aggregates, carbon  
486 stabilization and crop yield in an estuarine alluvial soil. *Sci. Rep.* **9**, 4586 (2019).
- 487 11 Prosdocimi, M. *et al.* The immediate effectiveness of barley straw mulch in reducing  
488 soil erodibility and surface runoff generation in Mediterranean vineyards. *Sci. Total*  
489 *Environ.* **547**, 323-330 (2016).
- 490 12 Liang, C., Schimel, J. P. & Jastrow, J. D. The importance of anabolism in microbial  
491 control over soil carbon storage. *Nat. Microbiol.* **2**, 17105 (2017).
- 492 13 Schimel, J. & Schaeffer, S. M. Microbial control over carbon cycling in soil. *Front.*  
493 *Microbiol.* **3**, 348 (2012).
- 494 14 Pierret, A. *et al.* Understanding deep roots and their functions in ecosystems: an  
495 advocacy for more unconventional research. *Ann. Bot.* **118**, 621-635,  
496 doi:10.1093/aob/mcw130 (2016).
- 497 15 Nevins, C. J., Nakatsu, C. & Armstrong, S. Characterization of microbial community  
498 response to cover crop residue decomposition. *Soil Biol. Biochem.* **127**, 39-49 (2018).
- 499 16 Hartmann, M., Frey, B., Mayer, J., Mäder, P. & Widmer, F. Distinct soil microbial  
500 diversity under long-term organic and conventional farming. *ISME J.* **9**, 1177-1194  
501 (2015).
- 502 17 Alahmad, A. *et al.* Cover crops in arable lands increase functional complementarity  
503 and redundancy of bacterial communities. *J. Appl. Ecol.* **56**, 651-664 (2019).
- 504 18 Germon, A., Laclau, J.-P., Robin, A. & Jourdan, C. Tamm Review: Deep fine roots in  
505 forest ecosystems: Why dig deeper? *For. Ecol. Manage.* **466**, 118135,  
506 doi:10.1016/j.foreco.2020.118135 (2020).

- 507 19 Eilers, K. G., Debenport, S., Anderson, S. & Fierer, N. Digging deeper to find unique  
508 microbial communities: the strong effect of depth on the structure of bacterial and  
509 archaeal communities in soil. *Soil Biol. Biochem.* **50**, 58-65 (2012).
- 510 20 Sagova-Mareckova, M. *et al.* The structure of bacterial communities along two  
511 vertical profiles of a deep colluvial soil. *Soil Biol. Biochem.* **101**, 65-73 (2016).
- 512 21 Pries, C. E. H., Castanha, C., Porras, R. & Torn, M. The whole-soil carbon flux in  
513 response to warming. *Science* **355**, 1420-1423 (2017).
- 514 22 Chorover, J., Kretschmar, R., Garcia-Pichel, F. & Sparks, D. L. Soil biogeochemical  
515 processes within the critical zone. *Elements* **3**, 321-326 (2007).
- 516 23 Liu, X. *et al.* Soil degradation: a problem threatening the sustainable development of  
517 agriculture in Northeast China. *Plant Soil Environ.* **56**, 87-97 (2010).
- 518 24 Liu, Z., Yang, X., Hubbard, K. G. & Lin, X. Maize potential yields and yield gaps in  
519 the changing climate of northeast China. *Glob. Chang. Biol.* **18**, 3441-3454 (2012).
- 520 25 Canadell, J. *et al.* Maximum rooting depth of vegetation types at the global scale.  
521 *Oecologia* **108**, 583-595 (1996).
- 522 26 Dakora, F. D. & Phillips, D. A. in *Food Security in Nutrient-Stressed Environments:*  
523 *Exploiting Plants' Genetic Capabilities* 201-213 (Springer, 2002).
- 524 27 Koike, I. & Hattori, A. Growth yield of a denitrifying bacterium, *Pseudomonas*  
525 denitrificans, under aerobic and denitrifying conditions. *Microbiology* **88**, 1-10  
526 (1975).
- 527 28 Miroshnichenko, M. L. *et al.* *Caldithrix abyssi* gen. nov., sp. nov., a nitrate-reducing,  
528 thermophilic, anaerobic bacterium isolated from a Mid-Atlantic Ridge hydrothermal



- 529 vent, represents a novel bacterial lineage. *Int. J. Syst. Evol. Microbiol.* **53**, 323-329  
530 (2003).
- 531 29 De Vita, P., Di Paolo, E., Fecondo, G., Di Fonzo, N. & Pisante, M. No-tillage and  
532 conventional tillage effects on durum wheat yield, grain quality and soil moisture  
533 content in southern Italy. *Soil Tillage Res.* **92**, 69-78 (2007).
- 534 30 Ramirez-Villanueva, D. A. *et al.* Bacterial community structure in maize residue  
535 amended soil with contrasting management practices. *Appl. Soil Ecol.* **90**, 49-59  
536 (2015).
- 537 31 Kremen, C. Managing ecosystem services: what do we need to know about their  
538 ecology? *Ecol. Lett.* **8**, 468-479 (2005).
- 539 32 Wood, S. A. *et al.* Agricultural intensification and the functional capacity of soil  
540 microbes on smallholder African farms. *J. Appl. Ecol.* **52**, 744-752 (2015).
- 541 33 Zhalnina, K. *et al.* Soil pH determines microbial diversity and composition in the park  
542 grass experiment. *Microb. Ecol.* **69**, 395-406 (2015).
- 543 34 Lauber, C. L., Hamady, M., Knight, R. & Fierer, N. Pyrosequencing-based assessment  
544 of soil pH as a predictor of soil bacterial community structure at the continental scale.  
545 *Appl. Environ. Microbiol.* **75**, 5111-5120 (2009).
- 546 35 Rousk, J. *et al.* Soil bacterial and fungal communities across a pH gradient in an  
547 arable soil. *ISME J.* **4**, 1340 (2010).
- 548 36 Lu, C. *et al.* Effects of N fertilization and maize straw on the dynamics of soil organic  
549 N and amino acid N derived from fertilizer N as indicated by <sup>15</sup>N labeling.  
550 *Geoderma* **321**, 118-126 (2018).

- 551 37 Liu, X. *et al.* Linking microbial immobilization of fertilizer nitrogen to in situ  
552 turnover of soil microbial residues in an agro-ecosystem. *Agric., Ecosyst. Environ.*  
553 **229**, 40-47 (2016).
- 554 38 Zhang, B., Wang, H., Yao, S. & Bi, L. Litter quantity confers soil functional resilience  
555 through mediating soil biophysical habitat and microbial community structure on an  
556 eroded bare land restored with mono *Pinus massoniana*. *Soil Biol. Biochem.* **57**,  
557 556-567 (2013).
- 558 39 Kibblewhite, M., Ritz, K. & Swift, M. Soil health in agricultural systems. *Philos*  
559 *Trans R Soc Lond B Biol Sci* **363**, 685-701 (2008).
- 560 40 Erbilgin, O., McDonald, K. L. & Kerfeld, C. A. Characterization of a planctomycetal  
561 organelle: a novel bacterial microcompartment for the aerobic degradation of plant  
562 saccharides. *Appl. Environ. Microbiol.* **80**, 2193-2205 (2014).
- 563 41 Herlemann, D. P. *et al.* Metagenomic de novo assembly of an aquatic representative  
564 of the verrucomicrobial class Spartobacteria. *MBio* **4**, e00569-00512 (2013).
- 565 42 Halsall, D. M. & Goodchild, D. J. Nitrogen fixation associated with development and  
566 localization of mixed populations of *Cellulomonas* sp. and *Azospirillum brasilense*  
567 grown on cellulose or wheat straw. *Appl. Environ. Microbiol.* **51**, 849-854 (1986).
- 568 43 Pathma, J., Raman, G. & Sakthivel, N. Microbiome of Rhizospheric Soil and  
569 Vermicompost and Their Applications in Soil Fertility, Pest and Pathogen  
570 Management for Sustainable Agriculture. 189-210 (*Springer, Singapore, 2019*).
- 571 44 Iino, T. *et al.* *Ignavibacterium album* gen. nov., sp. nov., a moderately thermophilic  
572 anaerobic bacterium isolated from microbial mats at a terrestrial hot spring and

- 573 proposal of Ignavibacteria classis nov., for a novel lineage at the periphery of green  
574 sulfur bacteria. *Int. J. Syst. Evol. Microbiol.* **60**, 1376-1382 (2010).
- 575 45 Terracciano, J. & Canale-Parola, E. Enhancement of chemotaxis in Spirochaeta  
576 aurantia grown under conditions of nutrient limitation. *J. Bacteriol.* **159**, 173-178  
577 (1984).
- 578 46 Thomas, F., Hehemann, J.-H., Rebuffet, E., Czjzek, M. & Michel, G. Environmental  
579 and gut bacteroidetes: the food connection. *Front. Microbiol.* **2**, 93 (2011).
- 580 47 Archontoulis, S. & Licht, M. A. How Fast and Deep do Corn Roots Grow in Iowa?  
581 *Integrated Crop Management News*, 2442 (2017).
- 582 48 Zhang, C., Ju, X., Powlson, D. S., Oenema, O. & Smith, P. Nitrogen surplus  
583 benchmarks for controlling N pollution in the main cropping systems of China.  
584 *Environ. Sci. Technol.* **53**, 6678-6687 (2019).
- 585 49 Izewska, A. & Woloszyk, C. Yields of grain and straw, their content and ionic  
586 proportions of macroelements in maize fertilized with ash from municipal sewage  
587 sludge combustion. *J Elementology* **20**, 319-329 (2015).
- 588 50 Kennedy, S. Energy use in American agriculture. *Sustainable energy term paper* **5**,  
589 1-26 (2000).
- 590 51 Zhang, W.-f. *et al.* New technologies reduce greenhouse gas emissions from  
591 nitrogenous fertilizer in China. *Proc. Natl. Acad. Sci. U.S.A.* **110**, 8375-8380 (2013).
- 592 52 Dwyer, L. *et al.* Root mass distribution under conventional and conservation tillage.  
593 *Can. J. Soil Sci.* **76**, 23-28 (1996).
- 594 53 Izumi, Y., Uchida, K. & Iijima, M. Crop production in successive wheat-soybean

- 595 rotation with no-tillage practice in relation to the root system development. *Plant*  
596 *production science* **7**, 329-336 (2004).
- 597 54 Goss-Souza, D. *et al.* Soil microbial community dynamics and assembly under  
598 long-term land use change. *FEMS Microbiol. Ecol.* **93**, fix109 (2017).
- 599 55 Stegen, J. C., Lin, X., Konopka, A. E. & Fredrickson, J. K. Stochastic and  
600 deterministic assembly processes in subsurface microbial communities. *ISME J.* **6**,  
601 1653 (2012).
- 602 56 Feng, Y. *et al.* Balanced fertilization decreases environmental filtering on soil  
603 bacterial community assemblage in north China. *Front. Microbiol.* **8**, 2376 (2017).
- 604 57 Chase, J. M. Stochastic community assembly causes higher biodiversity in more  
605 productive environments. *Science* **328**, 1388-1391 (2010).
- 606 58 IUSS Working Group, W. World reference base for soil resources. *World Soil*  
607 *Resources Report* **103**, FAO, Rome (2006).
- 608 59 Nelson, D. & Sommers, L. E. in *Methods of soil analysis, Part 2 (2nd)*. (eds AL Page,  
609 RH Miller, & DR Keeney) 539-579 (American Society of Agronomy and Soil  
610 Science Society of America, 1982).
- 611 60 Jones, D. & Willett, V. Experimental evaluation of methods to quantify dissolved  
612 organic nitrogen (DON) and dissolved organic carbon (DOC) in soil. *Soil Biol.*  
613 *Biochem.* **38**, 991-999 (2006).
- 614 61 Toosi, E. R., Castellano, M. J., Singer, J. W. & Mitchell, D. C. Differences in soluble  
615 organic matter after 23 years of contrasting soil management. *Soil Sci. Soc. Am. J.* **76**,  
616 628-637 (2012).

- 617 62 Bolger, A. M., Lohse, M. & Usadel, B. Trimmomatic: a flexible trimmer for Illumina  
618 sequence data. *Bioinformatics* **30**, 2114-2120 (2014).
- 619 63 Derakhshani, H., Tun, H. M. & Khafipour, E. An extended single-index multiplexed  
620 16S rRNA sequencing for microbial community analysis on MiSeq illumina platforms.  
621 *J. Basic Microbiol.* **56**, 321-326 (2016).
- 622 64 Mysara, M., Leys, N., Raes, J. & Monsieurs, P. IPED: a highly efficient denoising tool  
623 for Illumina MiSeq Paired-end 16S rRNA gene amplicon sequencing data. *BMC*  
624 *Bioinformatics* **17**, 192 (2016).
- 625 65 Wang, Q., Garrity, G. M., Tiedje, J. M. & Cole, J. R. Naive Bayesian classifier for  
626 rapid assignment of rRNA sequences into the new bacterial taxonomy. *Appl. Environ.*  
627 *Microbiol.* **73**, 5261-5267 (2007).
- 628 66 Cáceres, M. D. & Legendre, P. Associations between species and groups of sites:  
629 indices and statistical inference. *Ecology* **90**, 3566-3574 (2009).
- 630 67 Aßhauer, K. P., Wemheuer, B., Daniel, R. & Meinicke, P. Tax4Fun: predicting  
631 functional profiles from metagenomic 16S rRNA data. *Bioinformatics* **31**, 2882-2884  
632 (2015).
- 633 68 Parks, D. H., Tyson, G. W., Hugenholtz, P. & Beiko, R. G. STAMP: statistical analysis  
634 of taxonomic and functional profiles. *Bioinformatics* **30**, 3123-3124 (2014).  
635

636 **Figure legends**

637 **Figure 1.** Soil properties (mean± SE, n = 3) along soil depth under different practices. SOC =  
638 soil organic carbon, SEOC = salt-extractable organic carbon, SEOC/SOC = ratio of SEOC to  
639 SOC, SM = soil moisture, TN = total nitrogen content, C/N = ratio of SOC to TN,  $\text{NH}_4^+\text{-N}$  =  
640 ammonium nitrogen,  $\text{NO}_3^-\text{-N}$  = nitrate nitrogen, Inorganic N =  $\text{NH}_4^+\text{-N}$  +  $\text{NO}_3^-\text{-N}$ .

641 **Figure 2.** Corn yield (line+ symbol) and annual rainfall during growing and dormant seasons  
642 (bar) under different disturbance practices during 2013-2016. Error bars indicate standard  
643 errors (n = 3 or 4), different letters indicate significant differences at  $P < 0.05$ .

644 **Figure 3.** Microbial richness (Chao1), observed number of species (Observed\_species) and  
645 diversity (Shannon\_Index) in the CT (conventional tillage), NTNS (no-tillage without stover  
646 mulching) and NTSM (no-tillage with stover mulching) plots. Error bars indicate standard  
647 deviation (n = 3).

648 **Figure 4.** Indicator genera significantly ( $q < 0.1$ ) associated with tillage practices. The size of  
649 each circle represents the indicator value of a specific genus in the different soil depths. The  
650 color indicates the relative abundance of each indicator genus. Taxonomic information,  
651 indicator values, P-values, and q-values of all indicator genera are given in Table S2. Zero  
652 indicator genera were identified in CT treatment.

653 **Figure 5.** Non-metric multidimensional scaling (MDS) ordination of soil microbial  
654 community structures based on Bray-Curtis distances among soil depths at different  
655 agricultural disturbance practices. Permutational multivariate analysis of variance  
656 (PERMANOVA) revealed that the overall microbial community structures among soil depth  
657 were significantly different at each disturbance practice. Circles, triangles and squares  
658 represent CT (conventional tillage), NTNS (no-tillage without stover mulching) and NTSM  
659 (no-tillage with stover mulching), respectively.

660 **Figure 6.** Redundancy analysis (RDA) of the soil microbial community originating from  
661 microbial phyla constrained by soil properties under different agricultural practices. Only soil  
662 variables that significantly explained variability in microbial community structure in the  
663 forward selection procedure were selected to the ordination (arrows). TN, total nitrogen  
664 content; C/N, a ratio of carbon to nitrogen content;  $\text{NH}_4^+$ -N, ammonium nitrogen;  $\text{NO}_3^-$ -N,  
665 nitrate nitrogen ; SM, soil moisture. Circles, triangles and squares represent CT (conventional  
666 tillage), NTNS (no-tillage without stover mulching) and NTSM (no-tillage with stover  
667 mulching), respectively.  
668

669 **Figure 1**

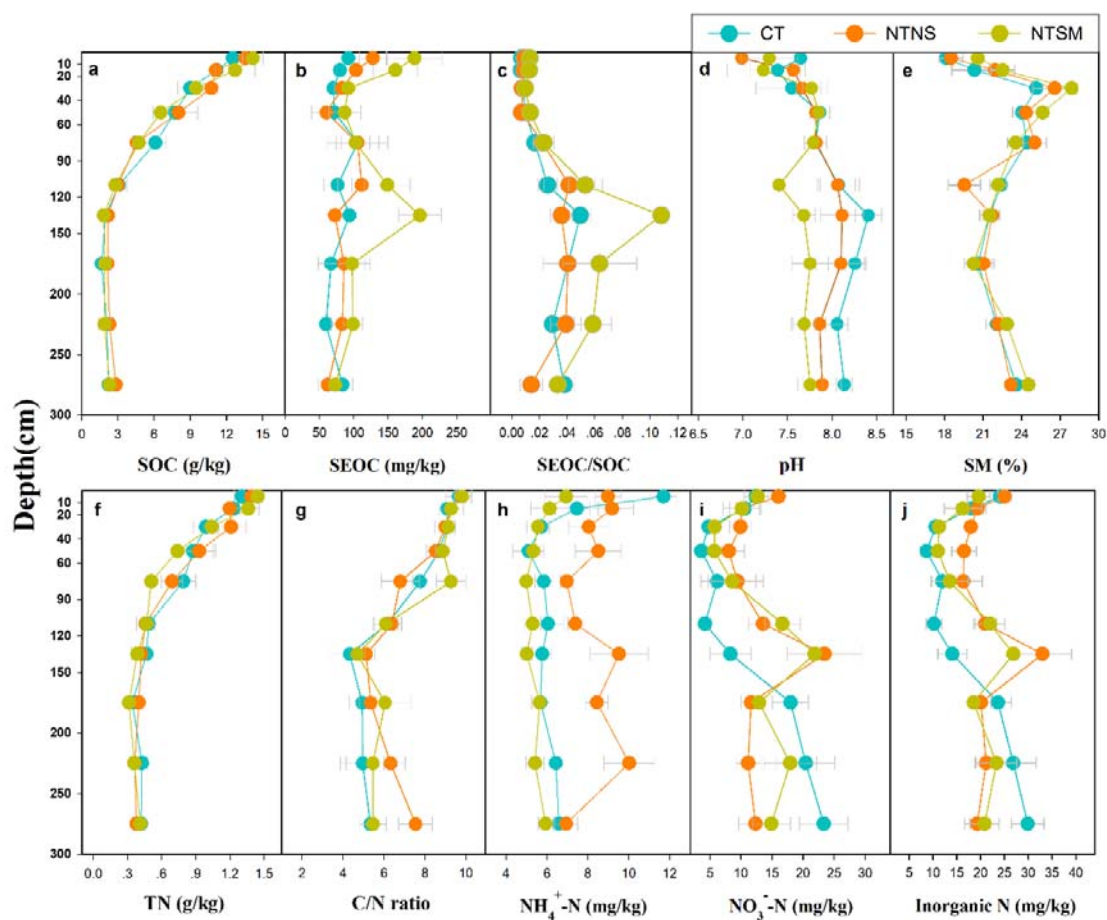

670  
671



672 **Figure 2**

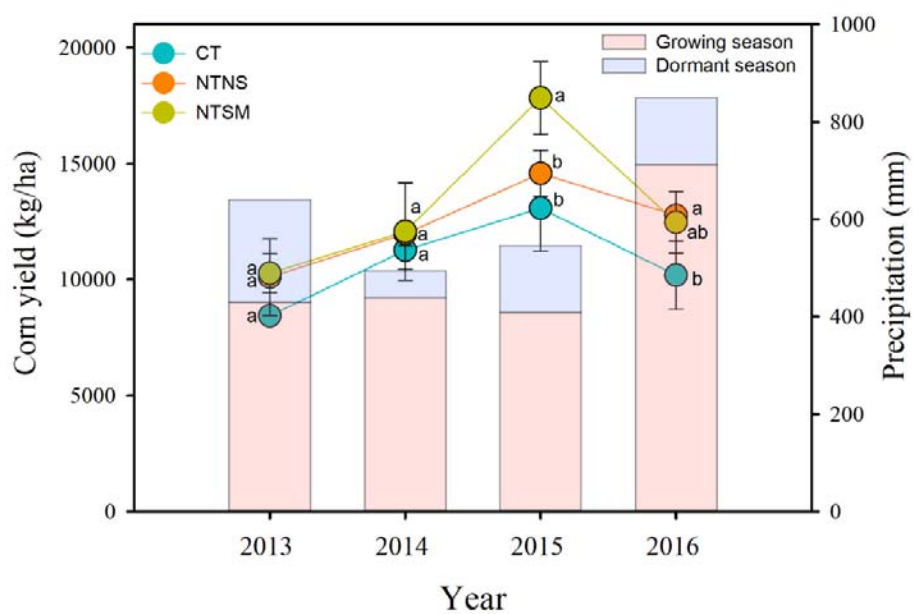

673

674

675 **Figure 3**

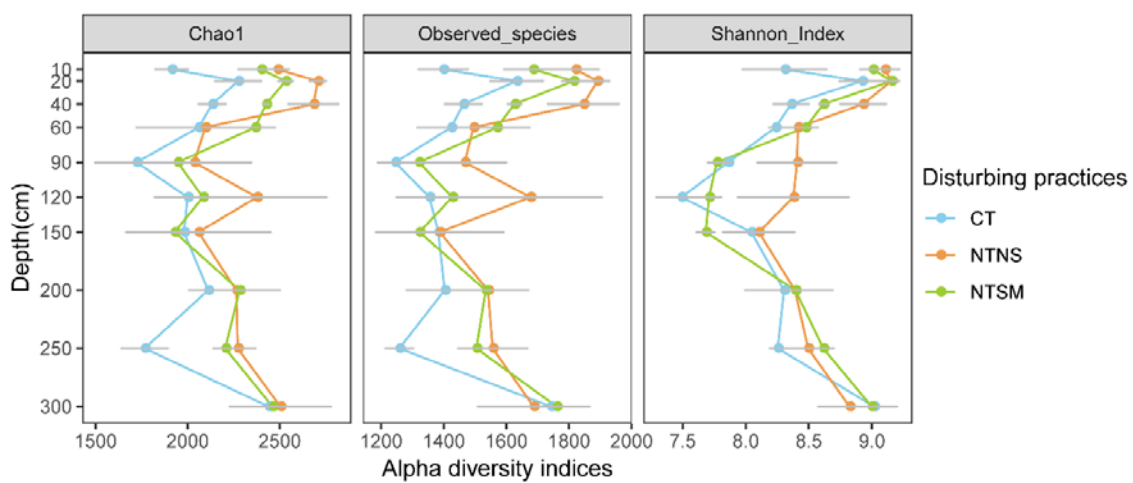

676

677

678 **Figure 4**

NTNS Treatment

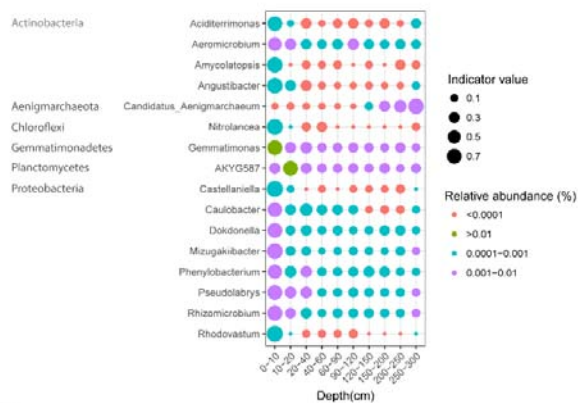

NTSM Treatment

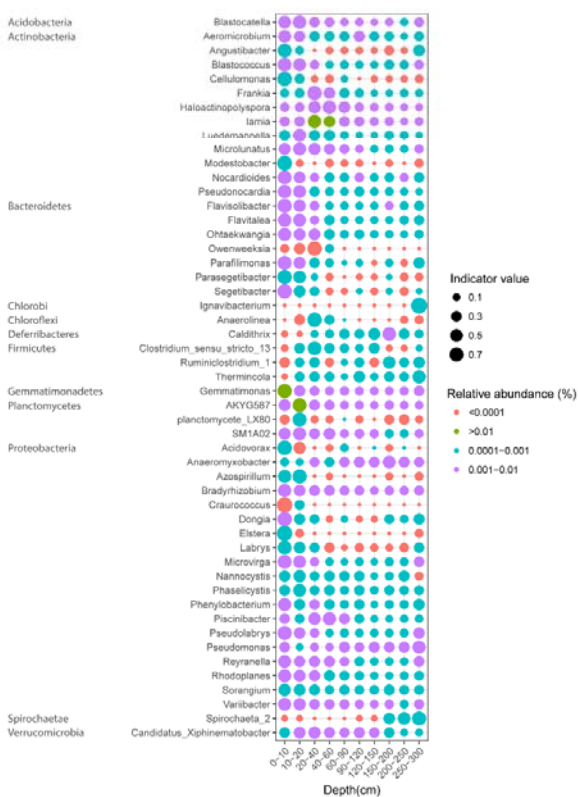

679

680

681 **Figure 5**

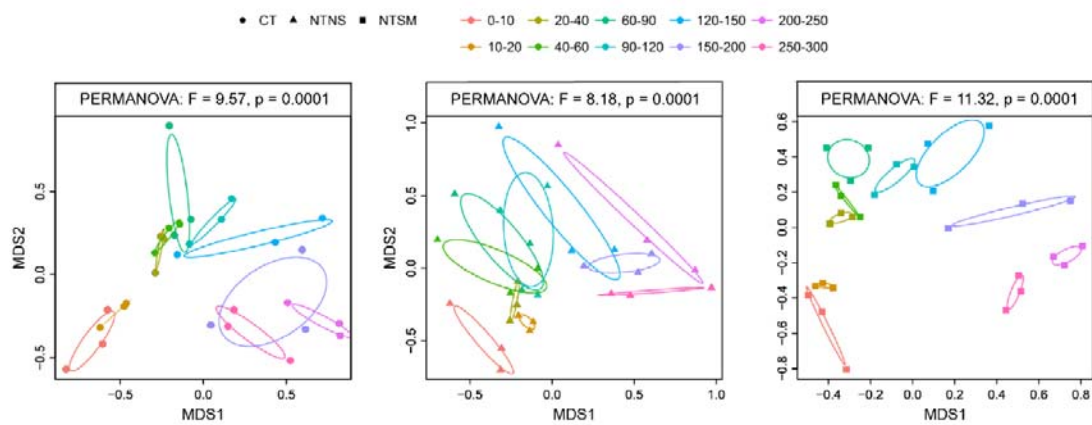

682

683

684 **Figure 6**

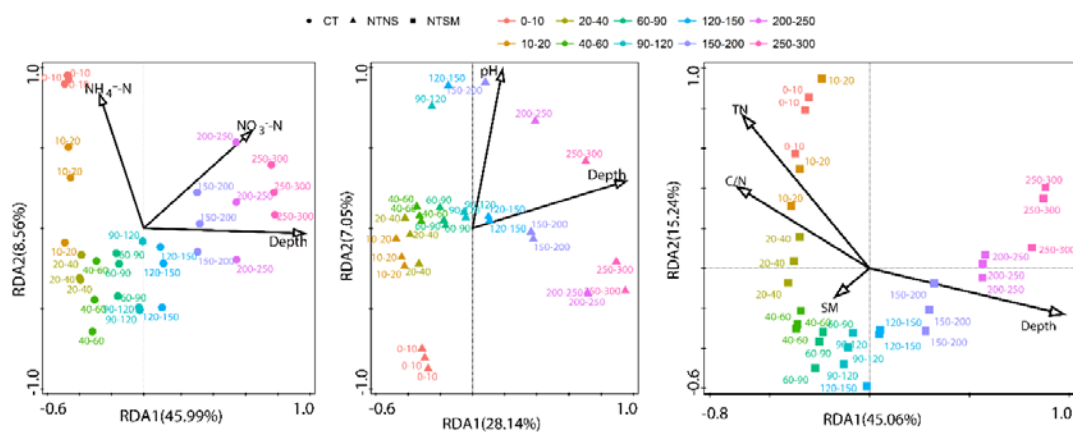

685

1 **Supplemental Information**

2 **Low-disturbance Farming Regenerates Healthy Deep Soil**  
3 **towards Sustainable Agriculture**

4 Fangbo Deng<sup>1,2#</sup>, Hongjun Wang<sup>3#</sup>, Hongtu Xie<sup>1#</sup>, Xuelian Bao<sup>1</sup>, Hongbo He<sup>1</sup>,  
5 Xudong Zhang<sup>1</sup>, Chao Liang<sup>1\*</sup>

6 <sup>1</sup>Key Laboratory of Forest Ecology and Management, Institute of Applied Ecology, Chinese  
7 Academy of Sciences, Shenyang 110016, China

8 <sup>2</sup>University of Chinese Academy of Sciences, Beijing 100049, China

9 <sup>3</sup>Duke University Wetland Center, Nicholas School of the Environment, Duke University, Durham,  
10 NC 27708, USA

11 \*Corresponding author: Chao Liang (Email: [cliang823@gmail.com](mailto:cliang823@gmail.com))

---

# These authors contributed equally to this work.

12

\*Corresponding author: Chao Liang (Email: [cliang823@gmail.com](mailto:cliang823@gmail.com))

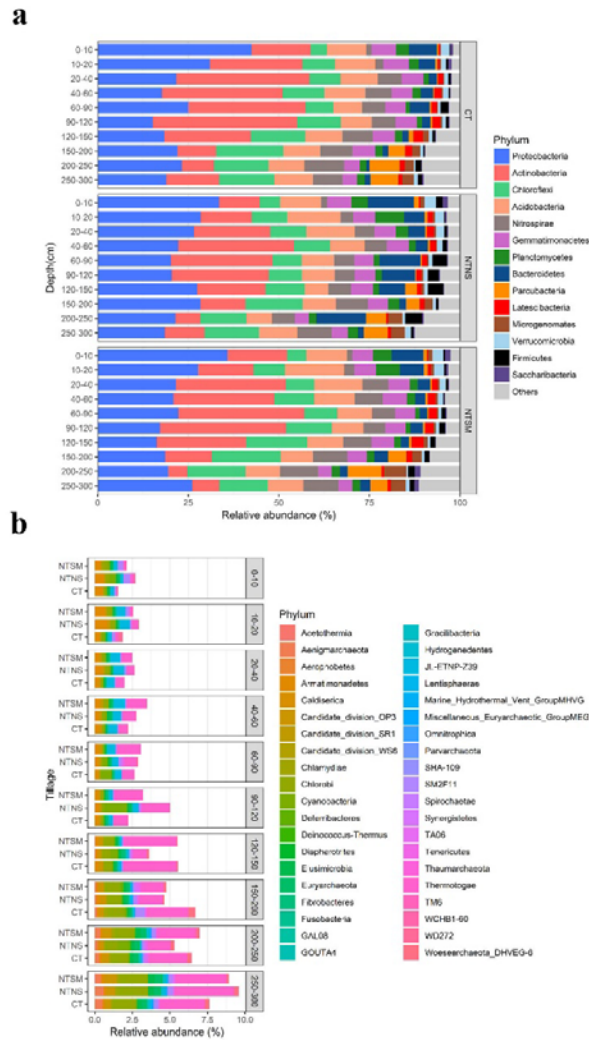

13

14 **Figure S1.** The relative abundance of bacterial community composition at the phylum  
15 level. **a** Only the bacterial phyla with the relative abundance > 0.1% across all soil  
16 samples were shown. **b** “Others” in the (a) panel represents the sum of bacterial  
17 phyla that individual relative abundance < 0.1% across all soil samples were shown.  
18 Abbreviations: CT (conventional tillage), NTNS (no-tillage without stover mulching)  
19 and NTSM (no-tillage with stover mulching).

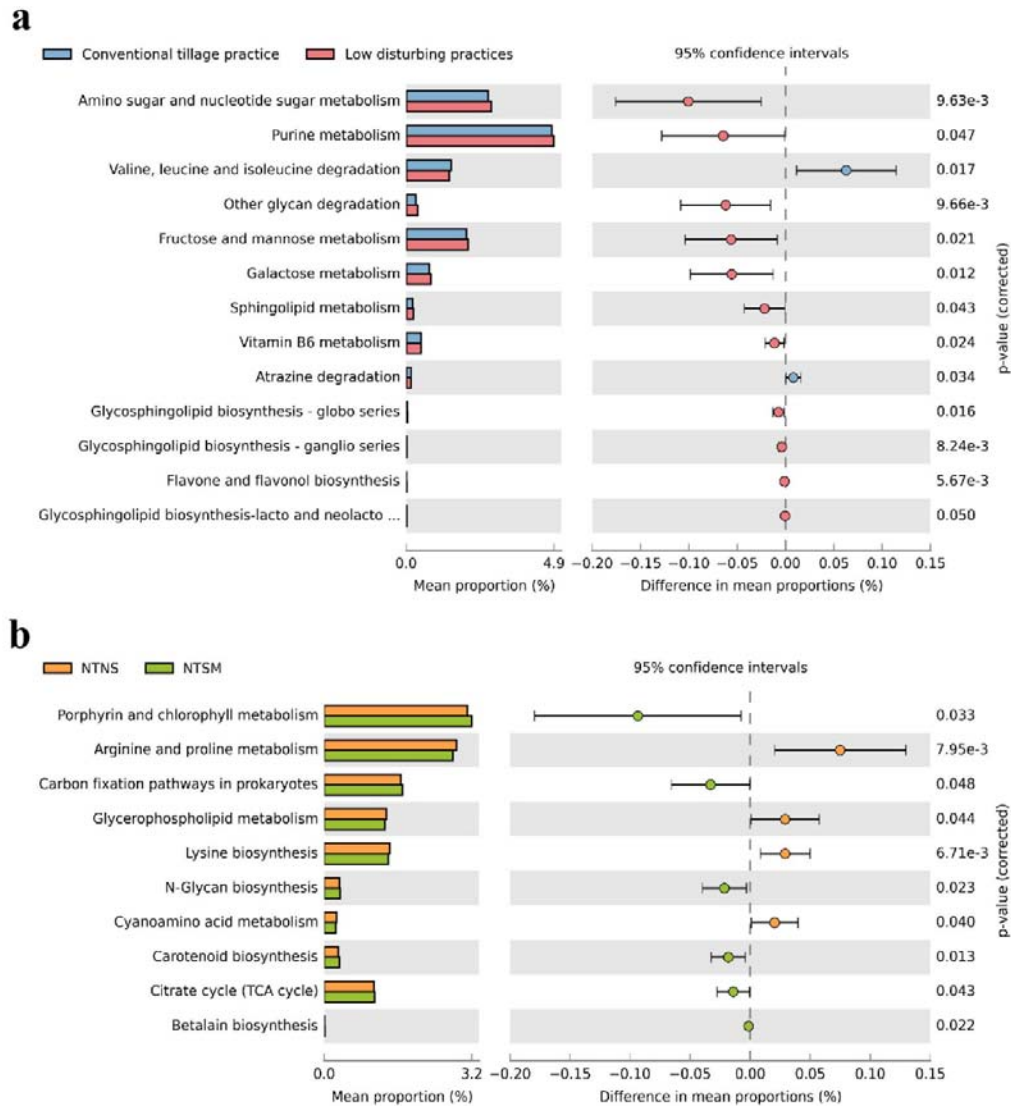

20

21 **Figure S2.** Extended error bar plots showing significant differences of 16S rRNA  
 22 gene-predicted functional profiles obtained with Tax4Fun. **a** difference between mean  
 23 proportions of conventional practice and low disturbance practices; **b** differences  
 24 between mean proportions of NTNS (no-tillage without stover mulching) and NTSM  
 25 (no-tillage with 100% stover mulching).



## Denitrification

### Dissimilatory nitrate reduction

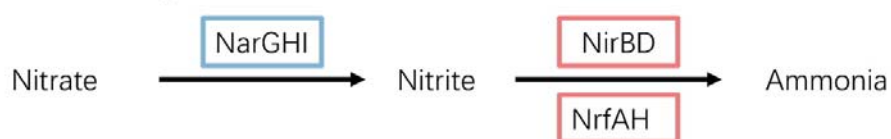

### Assimilatory nitrate reduction

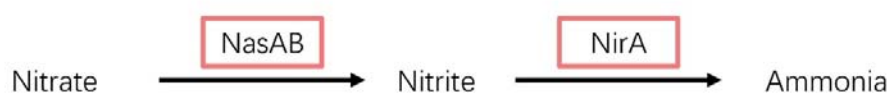

## Nitrification

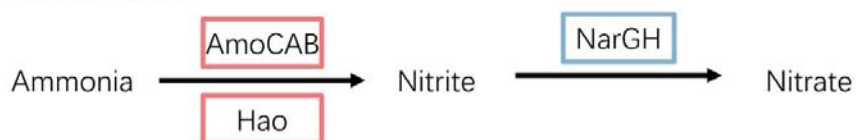

■ Conventional tillage practice ■ Low disturbing practices

26

27 **Figure S3.** The denitrification and nitrification genes that influenced by different  
28 tillage practices. Genes in red rectangles means higher abundance in low disturbing  
29 practices; Genes in blue rectangles means higher abundance in conventional tillage  
30 practice.

31

32

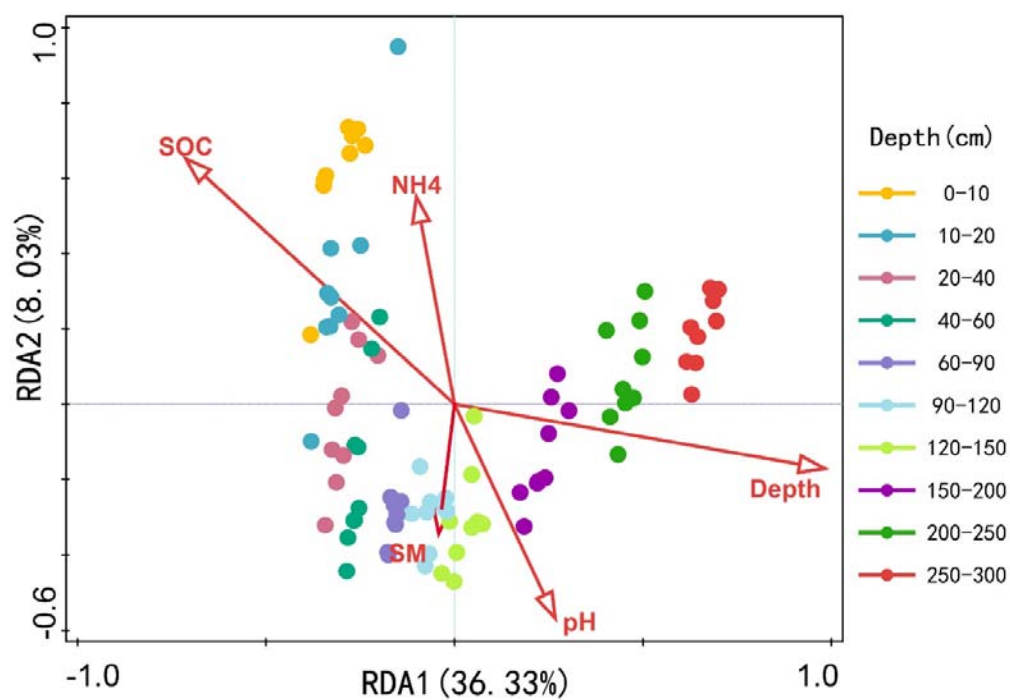

33

34

35 **Figure S4.** Redundancy analysis (RDA) of soil microbial community originating from  
36 microbial phyla constrained by soil properties among soil depths. Only soil  
37 variables that significantly explained variability in microbial community structure  
38 in the forward selection procedure were selected to the ordination (arrows).  
39 Abbreviations: SOC, soil organic carbon; NH<sub>4</sub>, ammonium nitrogen; SM, soil moisture.

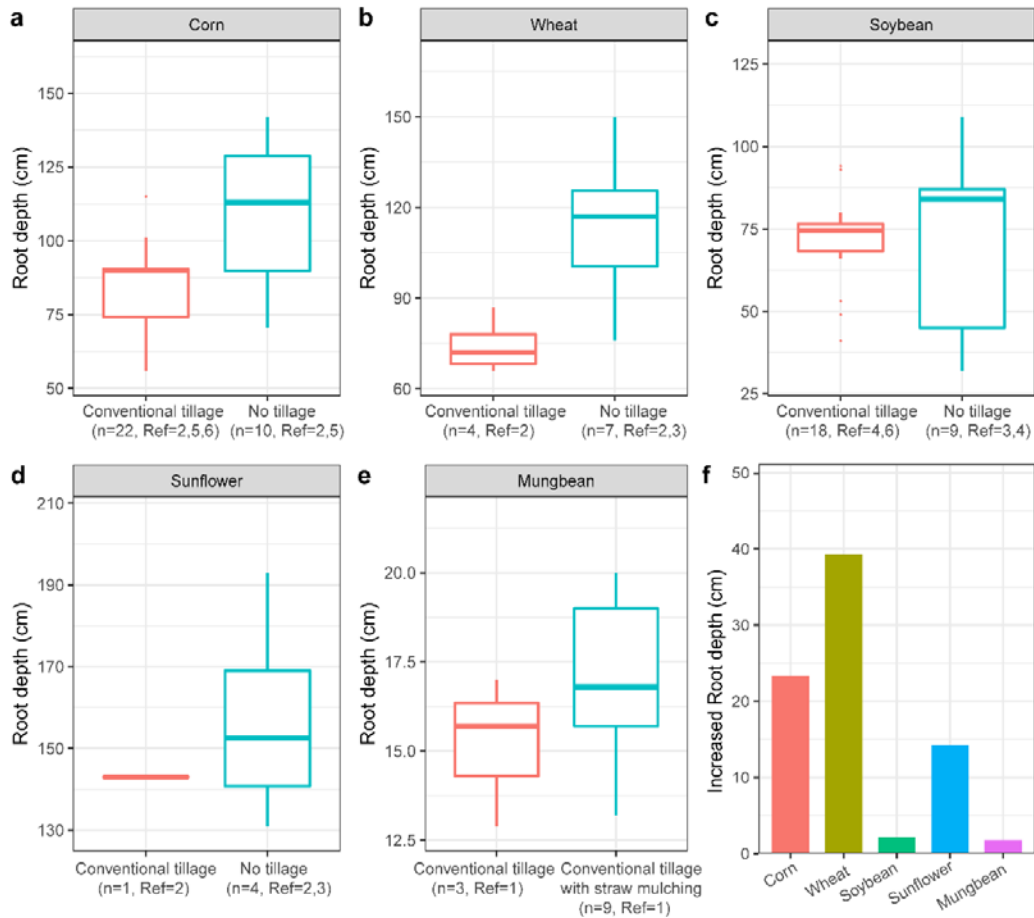

40

41 **Figure S5.** Root depths of different crops under different tillage practices. a,  
42 corn; b, wheat; c, soybean; d, sunflower; e, mungbean; f, the average root depth  
43 of crops under one tillage practice minus the average root depth under another  
44 tillage practice. n, numbers of observations; Ref, corresponding references number;  
45 Totally 87 observations were collected from following references: 1, Bunna et al.,  
46 2011; 2, Kemper et al., 2011; 3, Merrill et al., 2002; 4, Turman et al., 1995; 5, Dwyer  
47 et al., 1996; 6, Dwyer et al., 1988. See details in Table S5.

Table S1. Soil properties at different soil depths among disturbance practices.

| Soil Properties | Tillage | Soil depth (cm)   |                  |                  |                  |                  |                  |                  |                  |                  |                  |
|-----------------|---------|-------------------|------------------|------------------|------------------|------------------|------------------|------------------|------------------|------------------|------------------|
|                 |         | 0-10              | 10-20            | 20-40            | 40-60            | 60-90            | 90-120           | 120-150          | 150-200          | 200-250          | 250-300          |
| SOC             | CT      | 12.53 ± 0.53a     | 11.18 ± 0.40a    | 9.00 ± 1.83a     | 7.72 ± 3.16a     | 6.12 ± 1.49a     | 3.06 ± 1.10a     | 1.98 ± 0.61a     | 1.66 ± 0.16a     | 2.08 ± 0.49a     | 2.23 ± 0.10a     |
|                 | NTNS    | 13.56 ± 0.24a     | 11.12 ± 0.47a    | 10.76 ± 0.99a    | 8.03 ± 2.80a     | 4.56 ± 0.45a     | 3.01 ± 1.27a     | 2.19 ± 0.71a     | 2.14 ± 0.28a     | 2.31 ± 0.57a     | 2.82 ± 0.40a     |
|                 | NTSM    | 14.19 ± 1.46a     | 12.72 ± 2.88a    | 9.48 ± 0.28a     | 6.55 ± 0.28a     | 4.73 ± 0.91a     | 2.80 ± 0.17a     | 1.83 ± 0.51a     | 1.94 ± 0.86a     | 1.89 ± 0.82a     | 2.31 ± 0.78a     |
|                 |         | A                 | B                | C                | D                | E                | F                | F                | F                | F                | F                |
| SEOC            | CT      | 91.96 ± 3.52a     | 80.04 ± 13.92a   | 70.49 ± 7.75a    | 71.80 ± 29.67a   | 105.57 ± 53.39a  | 76.38 ± 35.40a   | 93.72 ± 11.15a   | 66.86 ± 5.74a    | 59.60 ± 10.62a   | 83.62 ± 25.10a   |
|                 | NTNS    | 127.96 ± 33.79ab  | 103.30 ± 50.78a  | 82.94 ± 18.61a   | 60.26 ± 37.99a   | 105.71 ± 76.22a  | 111.66 ± 60.32a  | 72.59 ± 11.21a   | 85.71 ± 64.89a   | 83.35 ± 27.37a   | 62.26 ± 19.80a   |
|                 | NTSM    | 188.67 ± 68.99b   | 160.78 ± 56.729a | 92.00 ± 3.789a   | 86.77 ± 40.429a  | 102.67 ± 36.07a  | 149.09 ± 58.04a  | 196.49 ± 53.90b  | 97.68 ± 31.36a   | 98.79 ± 24.44a   | 73.03 ± 14.10a   |
|                 |         | A                 | ABC              | BC               | C                | ABC              | ABC              | AB               | BC               | BC               | C                |
| SEOC/SOC        | CT      | 0.0073 ± 0.0003a  | 0.0072 ± 0.0012a | 0.0081 ± 0.0022a | 0.0098 ± 0.0048a | 0.0167 ± 0.0054a | 0.026 ± 0.012a   | 0.0496 ± 0.0129a | 0.0406 ± 0.006a  | 0.0294 ± 0.0066a | 0.0379 ± 0.0110a |
|                 | NTNS    | 0.0095 ± 0.0027ab | 0.0092 ± 0.0041a | 0.0077 ± 0.0011a | 0.0072 ± 0.0025a | 0.0223 ± 0.0141a | 0.0416 ± 0.0318a | 0.036 ± 0.0139a  | 0.0405 ± 0.0311a | 0.0392 ± 0.0191a | 0.0211 ± 0.0080a |
|                 | NTSM    | 0.013 ± 0.0037c   | 0.0126 ± 0.0039a | 0.0097 ± 0.0002a | 0.0134 ± 0.0068a | 0.0232 ± 0.013a  | 0.0532 ± 0.0209a | 0.1081 ± 0.0081b | 0.0636 ± 0.0465a | 0.0587 ± 0.0234a | 0.0333 ± 0.0070a |
|                 |         | A                 | A                | A                | A                | AB               | CD               | E                | D                | CD               | BC               |
| pH              | CT      | 7.65 ± 0.10a      | 7.39 ± 0.53a     | 7.55 ± 0.70a     | 7.86 ± 0.19a     | 7.81 ± 0.22a     | 8.07 ± 0.40a     | 8.41 ± 0.25a     | 8.26 ± 0.19a     | 8.06 ± 0.22a     | 8.14 ± 0.15a     |
|                 | NTNS    | 6.99 ± 0.06a      | 7.57 ± 0.08a     | 7.67 ± 0.13a     | 7.82 ± 0.04a     | 7.82 ± 0.05a     | 8.06 ± 0.34a     | 8.11 ± 0.42ab    | 8.10 ± 0.49a     | 7.86 ± 0.55a     | 7.89 ± 0.37a     |
|                 | NTSM    | 7.30 ± 0.77a      | 7.23 ± 0.71a     | 7.77 ± 0.18a     | 7.85 ± 0.06a     | 7.79 ± 0.03a     | 7.41 ± 0.04b     | 7.68 ± 0.22b     | 7.75 ± 0.36a     | 7.69 ± 0.22a     | 7.75 ± 0.24a     |
|                 |         | A                 | AB               | BC               | CD               | CD               | CD               | D                | D                | CD               | CD               |
| SM              | CT      | 18.14 ± 0.75a     | 20.32 ± 3.08a    | 25.14 ± 0.72a    | 24.03 ± 0.52a    | 24.40 ± 1.44a    | 22.38 ± 0.77a    | 21.51 ± 1.33a    | 20.60 ± 1.82a    | 22.07 ± 1.48a    | 23.57 ± 0.50a    |
|                 | NTNS    | 18.50 ± 1.63ab    | 21.93 ± 0.28a    | 26.58 ± 3.00a    | 24.34 ± 1.82a    | 25.02 ± 1.56a    | 19.53 ± 2.18a    | 21.71 ± 0.39a    | 21.02 ± 1.46a    | 22.17 ± 0.80a    | 23.17 ± 0.60a    |

|                                 |      |             |             |             |              |             |             |              |             |             |             |
|---------------------------------|------|-------------|-------------|-------------|--------------|-------------|-------------|--------------|-------------|-------------|-------------|
|                                 | NTSM | 20.58±0.64b | 22.53±1.62a | 27.90±0.27a | 25.64±0.72a  | 23.52±1.06a | 22.17±1.12a | 21.50±0.78a  | 20.26±0.41a | 22.87±0.56a | 24.53±0.79a |
|                                 | A    | BC          | E           | D           | D            | BC          | BC          | B            | C           | D           |             |
| TN                              | CT   | 1.31±0.12a  | 1.23±0.03a  | 0.99±0.20a  | 0.88±0.31a   | 0.79±0.19a  | 0.49±0.09a  | 0.47±0.05a   | 0.34±0.06a  | 0.43±0.08a  | 0.42±0.04a  |
|                                 | NTNS | 1.39±0.07a  | 1.20±0.05a  | 1.21±0.22a  | 0.93±0.25a   | 0.69±0.16a  | 0.46±0.14a  | 0.42±0.08a   | 0.40±0.05a  | 0.36±0.07a  | 0.38±0.06a  |
|                                 | NTSM | 1.44±0.08a  | 1.36±0.17a  | 1.04±0.09a  | 0.74±0.03a   | 0.51±0.07a  | 0.47±0.07a  | 0.39±0.09a   | 0.31±0.03a  | 0.36±0.05a  | 0.41±0.06a  |
|                                 | A    | B           | C           | D           | E            | F           | F           | F            | F           | F           |             |
| C/N                             | CT   | 9.65±1.10a  | 9.09±0.14a  | 9.08±0.44a  | 8.70±0.50a   | 7.76±0.64a  | 6.16±1.23a  | 4.33±1.66a   | 4.94±1.11a  | 4.96±1.40a  | 5.34±0.33a  |
|                                 | NTNS | 9.77±0.43a  | 9.27±0.32a  | 8.99±0.86a  | 8.53±0.80a   | 6.80±1.59a  | 6.39±0.77a  | 5.14±0.71a   | 5.36±0.30a  | 6.33±0.56a  | 7.54±1.43a  |
|                                 | NTSM | 9.82±0.64a  | 9.28±1.06a  | 9.14±0.48a  | 8.87±0.60a   | 9.27±1.24a  | 6.09±0.99a  | 4.71±0.65a   | 6.05±2.16a  | 5.46±2.76a  | 5.46±1.12a  |
|                                 | A    | A           | A           | AB          | B            | C           | C           | CD           | CD          | D           |             |
| NH <sub>4</sub> <sup>+</sup> -N | CT   | 11.69±1.10b | 7.47±1.81a  | 5.72±0.55a  | 5.11±1.33a   | 5.84±0.76a  | 6.05±1.32ab | 5.77±0.80a   | 5.68±0.74a  | 6.44±0.26a  | 6.59±0.89a  |
|                                 | NTNS | 8.99±1.08ab | 9.18±1.84a  | 8.04±1.67b  | 8.52±1.97b   | 6.97±0.52b  | 7.39±0.64b  | 9.53±2.44b   | 8.44±0.96b  | 10.02±2.14b | 6.94±0.99a  |
|                                 | NTSM | 6.94±1.78a  | 6.13±1.59a  | 5.57±0.97a  | 5.34±0.59a   | 4.99±0.08a  | 5.3±0.68a   | 5.02±0.41a   | 5.64±0.08a  | 5.42±0.76a  | 5.93±0.63a  |
|                                 | A    | B           | BCD         | BCD         | D            | CD          | BCD         | BCD          | BC          | BCD         |             |
| NO <sub>3</sub> <sup>-</sup> -N | CT   | 12.39±3.33a | 10.56±4.17a | 4.80±0.93a  | 3.61±0.86a   | 6.16±4.51a  | 4.19±1.69a  | 8.30±5.65a   | 17.98±5.06a | 20.43±8.04a | 23.32±6.77a |
|                                 | NTNS | 16.04±1.61a | 10.17±1.65a | 9.93±2.97b  | 8.03±4.36a   | 9.43±7.15a  | 13.55±4.16b | 23.45±10.34b | 11.63±2.74a | 11.15±3.46a | 12.35±4.71a |
|                                 | NTSM | 12.67±3.35a | 10.15±5.26a | 5.74±1.34a  | 5.71±2.04a   | 8.57±6.69a  | 16.68±4.89b | 21.90±1.24ab | 12.92±1.50a | 17.93±7.36a | 14.91±5.30a |
|                                 | AB   | BCD         | CD          | D           | CD           | BC          | A           | AB           | A           | A           |             |
| Inorganic N                     | CT   | 24.08±2.24a | 18.02±4.51a | 10.53±1.09a | 8.71±2.16a   | 12.01±4.05a | 10.24±2.84a | 14.07±5.26a  | 23.67±4.77a | 26.87±8.30a | 29.91±5.97a |
|                                 | NTNS | 25.03±2.40a | 19.35±3.07a | 17.97±1.37b | 16.55±4.47b  | 16.40±6.79a | 20.95±4.16b | 32.97±10.59b | 20.08±3.65a | 21.17±4.06a | 19.29±4.66a |
|                                 | NTSM | 19.61±4.23a | 16.28±6.79a | 11.31±0.65a | 11.05±1.50ab | 13.56±6.69a | 21.99±5.33b | 26.91±1.65ab | 18.56±1.57a | 23.34±7.40a | 20.84±5.26a |
|                                 | A    | BC          | CD          | D           | CD           | BC          | A           | AB           | A           | A           |             |

48 Different letters indicate significant differences at  $P < 0.05$ . Abbreviations: SOC = soil organic carbon; SEOC = salt-extractable organic  
49 carbon; SEOC/SOC = ratio of SEOC to SOC; SM = soil moisture; TN = total nitrogen content; C/N = ratio of SOC to TN;  $\text{NH}_4^+\text{-N}$  = ammonium nitrogen;  
50  $\text{NO}_3^-\text{-N}$  = nitrate nitrogen ; Inorganic N =  $\text{NH}_4^+\text{-N} + \text{NO}_3^-\text{-N}$ .

51

52 Table S2. Taxonomic information, indicator values, P-values and q-values of indicator genera associated with tillage practices.

| Land use | Phylum             | genera           | Soil Depth (cm) |           |           |           |           |        |         |         |         |         | p. value | qvalue      |
|----------|--------------------|------------------|-----------------|-----------|-----------|-----------|-----------|--------|---------|---------|---------|---------|----------|-------------|
|          |                    |                  | 0-10            | 10-20     | 20-40     | 40-60     | 60-90     | 90-120 | 120-150 | 150-200 | 200-250 | 250-300 |          |             |
| CT       | 0 indicator genera |                  |                 |           |           |           |           |        |         |         |         |         |          |             |
| NTNS     | Actinobacteria     | Aciditerrimonas  | 0.71<br>2       | 0.06<br>7 | 0.28<br>3 | 0.06<br>7 | 0.18<br>9 | 0.267  | 0.115   | 0.249   | 0.067   | 0.231   | 0.0018   | 0.0842<br>6 |
| NTNS     | Actinobacteria     | Angustibacter    | 0.81<br>6       | 0.29<br>5 | 0.29<br>5 | 0.09<br>8 | 0.07<br>0 | 0.070  | 0.098   | 0.070   | 0.070   | 0.120   | 0.0018   | 0.0842<br>6 |
| NTNS     | Actinobacteria     | Aeromicrobium    | 0.57<br>2       | 0.34<br>1 | 0.27<br>4 | 0.21<br>0 | 0.28<br>0 | 0.348  | 0.243   | 0.194   | 0.262   | 0.206   | 0.0018   | 0.0842<br>6 |
| NTNS     | Actinobacteria     | Amycolatopsis    | 0.80<br>3       | 0.00<br>0 | 0.14<br>7 | 0.10<br>4 | 0.14<br>7 | 0.000  | 0.104   | 0.000   | 0.254   | 0.147   | 0.0018   | 0.0842<br>6 |
| NTNS     | Chloroflexi        | Nitrolancea      | 0.87<br>9       | 0.00<br>0 | 0.17<br>4 | 0.24<br>6 | 0.00<br>0 | 0.000  | 0.000   | 0.000   | 0.000   | 0.123   | 0.0018   | 0.0842<br>6 |
| NTNS     | Gemmatimonadetes   | Gemmatimonas     | 0.71<br>2       | 0.31<br>5 | 0.36<br>3 | 0.17<br>8 | 0.19<br>0 | 0.231  | 0.190   | 0.152   | 0.253   | 0.135   | 0.0013   | 0.0842<br>6 |
| NTNS     | Proteobacteria     | Caulobacter      | 0.67<br>3       | 0.27<br>6 | 0.43<br>4 | 0.26<br>5 | 0.26<br>2 | 0.200  | 0.085   | 0.147   | 0.135   | 0.110   | 0.0034   | 0.0975      |
| NTNS     | Proteobacteria     | Phenylobacterium | 0.64<br>3       | 0.35<br>9 | 0.34<br>2 | 0.18<br>9 | 0.18<br>4 | 0.236  | 0.305   | 0.285   | 0.154   | 0.130   | 0.0018   | 0.0842<br>6 |
| NTNS     | Proteobacteria     | Rhizomicrobium   | 0.74<br>7       | 0.28<br>0 | 0.29<br>4 | 0.14<br>5 | 0.22<br>7 | 0.221  | 0.234   | 0.183   | 0.173   | 0.150   | 0.0018   | 0.0842<br>6 |
| NTNS     | Proteobacteria     | Pseudolabrys     | 0.71<br>7       | 0.35<br>7 | 0.34<br>2 | 0.16<br>5 | 0.16<br>5 | 0.219  | 0.193   | 0.161   | 0.177   | 0.128   | 0.0018   | 0.0842<br>6 |
| NTNS     | Proteobacteria     | Rhodovastum      | 0.89<br>0       | 0.00<br>0 | 0.11<br>8 | 0.11<br>8 | 0.11<br>8 | 0.167  | 0.000   | 0.000   | 0.000   | 0.000   | 0.0018   | 0.0842<br>6 |
| NTNS     | Proteobacteria     | Castellaniella   | 0.90<br>3       | 0.09<br>4 | 0.00<br>0 | 0.09<br>4 | 0.00<br>0 | 0.094  | 0.094   | 0.094   | 0.187   | 0.000   | 0.0018   | 0.0842<br>6 |

|      |                 |                               |           |           |           |           |           |       |       |       |       |       |        |             |
|------|-----------------|-------------------------------|-----------|-----------|-----------|-----------|-----------|-------|-------|-------|-------|-------|--------|-------------|
| NTNS | Proteobacteria  | Dokdonella                    | 0.72<br>5 | 0.20<br>9 | 0.28<br>9 | 0.16<br>2 | 0.22<br>3 | 0.132 | 0.153 | 0.256 | 0.248 | 0.121 | 0.0018 | 0.0842<br>6 |
| NTNS | Proteobacteria  | Mizugakiibacter               | 0.85<br>7 | 0.22<br>6 | 0.21<br>0 | 0.07<br>2 | 0.12<br>7 | 0.160 | 0.139 | 0.098 | 0.208 | 0.116 | 0.0018 | 0.0842<br>6 |
| NTNS | Planctomycetes  | AKYG587                       | 0.30<br>6 | 0.70<br>9 | 0.30<br>1 | 0.20<br>0 | 0.19<br>3 | 0.237 | 0.178 | 0.285 | 0.125 | 0.223 | 0.0027 | 0.0842<br>6 |
| NTNS | Aenigmarchaeota | Candidatus<br>_Aenigmarchaeum | 0.06<br>7 | 0.09<br>7 | 0.08<br>2 | 0.07<br>4 | 0.04<br>7 | 0.030 | 0.129 | 0.308 | 0.432 | 0.794 | 0.0026 | 0.0842<br>6 |
| NTSM | Actinobacteria  | Blastococcus                  | 0.66<br>0 | 0.54<br>1 | 0.20<br>8 | 0.13<br>1 | 0.17<br>2 | 0.147 | 0.125 | 0.249 | 0.189 | 0.216 | 0.0115 | 0.0992<br>6 |
| NTSM | Actinobacteria  | Modestobacter                 | 0.80<br>0 | 0.11<br>5 | 0.00<br>0 | 0.16<br>3 | 0.11<br>5 | 0.115 | 0.000 | 0.115 | 0.000 | 0.200 | 0.003  | 0.0940<br>3 |
| NTSM | Actinobacteria  | Angustibacter                 | 0.69<br>9 | 0.17<br>6 | 0.00<br>0 | 0.12<br>5 | 0.12<br>5 | 0.125 | 0.088 | 0.249 | 0.088 | 0.431 | 0.0093 | 0.0945<br>4 |
| NTSM | Actinobacteria  | Cellulomonas                  | 0.77<br>8 | 0.26<br>5 | 0.09<br>4 | 0.16<br>2 | 0.09<br>4 | 0.000 | 0.094 | 0.094 | 0.094 | 0.162 | 0.003  | 0.0940<br>3 |
| NTSM | Actinobacteria  | Aeromicrobium                 | 0.54<br>6 | 0.38<br>1 | 0.28<br>8 | 0.27<br>5 | 0.26<br>3 | 0.376 | 0.249 | 0.231 | 0.102 | 0.249 | 0.003  | 0.0940<br>3 |
| NTSM | Actinobacteria  | Nocardioides                  | 0.66<br>4 | 0.42<br>7 | 0.19<br>7 | 0.24<br>5 | 0.21<br>4 | 0.214 | 0.167 | 0.224 | 0.183 | 0.274 | 0.0063 | 0.0940<br>3 |
| NTSM | Actinobacteria  | Pseudonocardia                | 0.63<br>0 | 0.54<br>2 | 0.27<br>0 | 0.18<br>3 | 0.14<br>6 | 0.258 | 0.149 | 0.168 | 0.127 | 0.101 | 0.0063 | 0.0940<br>3 |
| NTSM | Bacteroidetes   | Ohtaekwangia                  | 0.58<br>3 | 0.44<br>1 | 0.41<br>5 | 0.31<br>7 | 0.17<br>2 | 0.241 | 0.146 | 0.147 | 0.113 | 0.195 | 0.0086 | 0.0940<br>3 |
| NTSM | Bacteroidetes   | Flavisolibacter               | 0.71<br>7 | 0.48<br>1 | 0.22<br>6 | 0.14<br>7 | 0.15<br>0 | 0.129 | 0.133 | 0.160 | 0.180 | 0.260 | 0.003  | 0.0940<br>3 |
| NTSM | Bacteroidetes   | Flavitalea                    | 0.61<br>8 | 0.55<br>2 | 0.20<br>2 | 0.29<br>5 | 0.12<br>8 | 0.140 | 0.128 | 0.128 | 0.214 | 0.268 | 0.0079 | 0.0940<br>3 |
| NTSM | Bacteroidetes   | Parafilimonas                 | 0.68<br>7 | 0.46<br>7 | 0.29<br>4 | 0.17<br>5 | 0.02<br>9 | 0.101 | 0.041 | 0.133 | 0.101 | 0.377 | 0.0072 | 0.0940<br>3 |



|      |                  |                  |      |      |      |      |      |       |       |       |       |       |        |        |
|------|------------------|------------------|------|------|------|------|------|-------|-------|-------|-------|-------|--------|--------|
|      |                  |                  | 0.74 | 0.54 | 0.08 | 0.12 | 0.00 |       |       |       |       |       |        | 0.0940 |
| NTSM | Bacteroidetes    | Parasegetibacter | 2    | 0    | 9    | 5    | 0    | 0.072 | 0.072 | 0.051 | 0.162 | 0.145 | 0.003  | 3      |
|      |                  |                  | 0.74 | 0.43 | 0.23 | 0.11 | 0.07 |       |       |       |       |       |        | 0.0940 |
| NTSM | Bacteroidetes    | Segetibacter     | 9    | 2    | 7    | 2    | 9    | 0.056 | 0.125 | 0.079 | 0.193 | 0.056 | 0.0074 | 3      |
|      |                  |                  | 0.73 | 0.36 | 0.23 | 0.18 | 0.20 |       |       |       |       |       |        | 0.0940 |
| NTSM | Gemmatimonadetes | Gemmatimonas     | 0    | 7    | 8    | 4    | 2    | 0.172 | 0.162 | 0.167 | 0.182 | 0.290 | 0.005  | 3      |
|      |                  |                  | 0.57 | 0.35 | 0.28 | 0.29 | 0.19 |       |       |       |       |       |        | 0.0940 |
| NTSM | Proteobacteria   | Phenylobacterium | 3    | 7    | 6    | 5    | 0    | 0.290 | 0.104 | 0.195 | 0.195 | 0.380 | 0.0083 | 3      |
|      |                  |                  | 0.59 | 0.41 | 0.32 | 0.30 | 0.24 |       |       |       |       |       |        | 0.0940 |
| NTSM | Proteobacteria   | Bradyrhizobium   | 0    | 1    | 6    | 6    | 1    | 0.235 | 0.154 | 0.212 | 0.198 | 0.249 | 0.003  | 3      |
|      |                  |                  | 0.56 | 0.44 | 0.36 | 0.34 | 0.25 |       |       |       |       |       |        | 0.0940 |
| NTSM | Proteobacteria   | Rhodoplanes      | 6    | 0    | 8    | 6    | 2    | 0.218 | 0.133 | 0.126 | 0.168 | 0.241 | 0.0054 | 3      |
|      |                  |                  | 0.67 | 0.53 | 0.19 | 0.14 | 0.10 |       |       |       |       |       |        | 0.0984 |
| NTSM | Proteobacteria   | Microvirga       | 2    | 6    | 9    | 4    | 2    | 0.158 | 0.102 | 0.188 | 0.171 | 0.299 | 0.0109 | 3      |
|      |                  |                  | 0.67 | 0.42 | 0.25 | 0.27 | 0.05 |       |       |       |       |       |        | 0.0940 |
| NTSM | Proteobacteria   | Labrys           | 3    | 3    | 7    | 5    | 6    | 0.194 | 0.137 | 0.112 | 0.217 | 0.291 | 0.0063 | 3      |
|      |                  |                  | 0.70 | 0.39 | 0.21 | 0.13 | 0.18 |       |       |       |       |       |        | 0.0940 |
| NTSM | Proteobacteria   | Pseudolabrys     | 6    | 1    | 9    | 6    | 5    | 0.157 | 0.149 | 0.160 | 0.175 | 0.380 | 0.0052 | 3      |
|      |                  |                  | 0.57 | 0.48 | 0.29 | 0.27 | 0.25 |       |       |       |       |       |        | 0.0940 |
| NTSM | Proteobacteria   | Variibacter      | 1    | 6    | 9    | 7    | 8    | 0.193 | 0.159 | 0.206 | 0.175 | 0.264 | 0.0059 | 3      |
|      |                  |                  | 0.88 | 0.27 | 0.00 | 0.00 | 0.00 |       |       |       |       |       |        | 0.0945 |
| NTSM | Proteobacteria   | Craurococcus     | 2    | 2    | 0    | 0    | 0    | 0.000 | 0.000 | 0.000 | 0.000 | 0.000 | 0.009  | 4      |
|      |                  |                  | 0.74 | 0.35 | 0.23 | 0.08 | 0.08 |       |       |       |       |       |        | 0.0945 |
| NTSM | Proteobacteria   | Dongia           | 0    | 5    | 7    | 4    | 4    | 0.068 | 0.076 | 0.244 | 0.153 | 0.360 | 0.0096 | 4      |
|      |                  |                  | 0.89 | 0.18 | 0.00 | 0.00 | 0.00 |       |       |       |       |       |        | 0.0940 |
| NTSM | Proteobacteria   | Elstera          | 4    | 3    | 0    | 0    | 0    | 0.000 | 0.000 | 0.000 | 0.000 | 0.183 | 0.0072 | 3      |
|      |                  |                  | 0.55 | 0.37 | 0.36 | 0.35 | 0.23 |       |       |       |       |       |        | 0.0940 |
| NTSM | Proteobacteria   | Reyranella       | 1    | 3    | 4    | 5    | 4    | 0.248 | 0.154 | 0.163 | 0.151 | 0.329 | 0.0073 | 3      |
|      |                  |                  | 0.77 | 0.49 | 0.00 | 0.11 | 0.16 |       |       |       |       |       |        | 0.0940 |
| NTSM | Proteobacteria   | Acidovorax       | 5    | 0    | 0    | 5    | 3    | 0.000 | 0.000 | 0.115 | 0.000 | 0.000 | 0.0063 | 3      |

|      |                 |                     |      |      |      |      |      |       |       |       |       |       |        |        |
|------|-----------------|---------------------|------|------|------|------|------|-------|-------|-------|-------|-------|--------|--------|
|      |                 |                     | 0.49 | 0.41 | 0.34 | 0.20 | 0.28 |       |       |       |       |       |        | 0.0940 |
| NTSM | Proteobacteria  | Sorangium           | 1    | 7    | 1    | 9    | 7    | 0.231 | 0.231 | 0.333 | 0.251 | 0.251 | 0.0059 | 3      |
|      |                 |                     | 0.54 | 0.62 | 0.29 | 0.24 | 0.15 |       |       |       |       |       |        | 0.0992 |
| NTSM | Acidobacteria   | Blastocatella       | 5    | 3    | 5    | 2    | 1    | 0.163 | 0.108 | 0.156 | 0.140 | 0.252 | 0.0114 | 6      |
|      |                 |                     | 0.37 | 0.60 | 0.38 | 0.39 | 0.17 |       |       |       |       |       |        | 0.0940 |
| NTSM | Actinobacteria  | Luedemannella       | 2    | 8    | 6    | 9    | 5    | 0.101 | 0.101 | 0.238 | 0.189 | 0.101 | 0.0031 | 3      |
|      |                 |                     | 0.43 | 0.55 | 0.45 | 0.34 | 0.24 |       |       |       |       |       |        | 0.0940 |
| NTSM | Actinobacteria  | Microclunatus       | 3    | 9    | 9    | 1    | 1    | 0.135 | 0.125 | 0.163 | 0.130 | 0.193 | 0.0031 | 3      |
|      |                 |                     | 0.43 | 0.68 | 0.33 | 0.26 | 0.16 |       |       |       |       |       |        | 0.0940 |
| NTSM | Planctomycetes  | AKYG587             | 1    | 0    | 0    | 5    | 3    | 0.182 | 0.137 | 0.213 | 0.157 | 0.153 | 0.0031 | 3      |
|      |                 |                     | 0.44 | 0.56 | 0.31 | 0.40 | 0.17 |       |       |       |       |       |        | 0.0945 |
| NTSM | Planctomycetes  | SM1A02              | 9    | 8    | 8    | 6    | 3    | 0.223 | 0.189 | 0.183 | 0.169 | 0.179 | 0.0099 | 8      |
|      |                 |                     | 0.25 | 0.69 | 0.12 | 0.12 | 0.00 |       |       |       |       |       |        | 0.0940 |
| NTSM | Planctomycetes  | planctomycete_LX80  | 2    | 0    | 6    | 6    | 0    | 0.126 | 0.000 | 0.252 | 0.309 | 0.126 | 0.0054 | 3      |
|      |                 |                     | 0.59 | 0.73 | 0.00 | 0.08 | 0.00 |       |       |       |       |       |        | 0.0940 |
| NTSM | Proteobacteria  | Azospirillum        | 1    | 1    | 0    | 8    | 0    | 0.000 | 0.000 | 0.125 | 0.000 | 0.176 | 0.0079 | 3      |
|      |                 |                     | 0.37 | 0.49 | 0.24 | 0.32 | 0.30 |       |       |       |       |       |        | 0.0940 |
| NTSM | Proteobacteria  | Nannocystis         | 6    | 2    | 2    | 9    | 3    | 0.316 | 0.105 | 0.197 | 0.365 | 0.183 | 0.0054 | 3      |
|      |                 |                     | 0.34 | 0.55 | 0.24 | 0.32 | 0.20 |       |       |       |       |       |        | 0.0940 |
| NTSM | Proteobacteria  | Phaselicystis       | 0    | 5    | 8    | 8    | 3    | 0.304 | 0.175 | 0.263 | 0.226 | 0.248 | 0.0049 | 3      |
|      |                 |                     | 0.07 | 0.04 | 0.12 | 0.20 | 0.31 |       |       |       |       |       |        | 0.0940 |
| NTSM | Deferribacteres | Caldithrix          | 9    | 6    | 5    | 2    | 2    | 0.257 | 0.444 | 0.646 | 0.336 | 0.194 | 0.0047 | 3      |
|      |                 |                     | 0.30 | 0.22 | 0.30 | 0.19 | 0.07 |       |       |       |       |       |        | 0.0940 |
| NTSM | Firmicutes      | Ruminiclostridium_1 | 2    | 0    | 2    | 1    | 8    | 0.246 | 0.220 | 0.505 | 0.246 | 0.405 | 0.0068 | 3      |
|      |                 |                     | 0.18 | 0.12 | 0.25 | 0.25 | 0.29 |       |       |       |       |       |        | 0.0945 |
| NTSM | Proteobacteria  | Anaeromyxobacter    | 5    | 3    | 1    | 4    | 3    | 0.352 | 0.333 | 0.540 | 0.368 | 0.275 | 0.0098 | 4      |
|      |                 |                     | 0.28 | 0.30 | 0.60 | 0.40 | 0.31 |       |       |       |       |       |        | 0.0940 |
| NTSM | Actinobacteria  | Iamia               | 2    | 6    | 9    | 0    | 7    | 0.268 | 0.189 | 0.207 | 0.118 | 0.177 | 0.0026 | 3      |
|      |                 |                     | 0.18 | 0.23 | 0.74 | 0.40 | 0.27 |       |       |       |       |       |        | 0.0940 |
| NTSM | Actinobacteria  | Frankia             | 6    | 7    | 7    | 3    | 1    | 0.197 | 0.093 | 0.107 | 0.161 | 0.140 | 0.0026 | 3      |

|      |                 |                              |      |      |      |      |      |       |       |       |       |       |        |        |
|------|-----------------|------------------------------|------|------|------|------|------|-------|-------|-------|-------|-------|--------|--------|
|      |                 |                              | 0.19 | 0.38 | 0.74 | 0.19 | 0.00 |       |       |       |       |       |        | 0.0955 |
| NTSM | Bacteroidetes   | Owenweeksia                  | 2    | 5    | 5    | 2    | 0    | 0.000 | 0.000 | 0.000 | 0.000 | 0.000 | 0.0102 | 9      |
|      |                 |                              | 0.00 | 0.33 | 0.74 | 0.27 | 0.00 |       |       |       |       |       |        | 0.0940 |
| NTSM | Chloroflexi     | Anaerolinea                  | 0    | 3    | 5    | 2    | 0    | 0.000 | 0.000 | 0.000 | 0.136 | 0.192 | 0.0082 | 3      |
|      |                 |                              | 0.10 | 0.32 | 0.67 | 0.29 | 0.21 |       |       |       |       |       |        | 0.0940 |
| NTSM | Firmicutes      | Clostridium_sensu_stricto_13 | 8    | 4    | 5    | 6    | 6    | 0.153 | 0.350 | 0.076 | 0.076 | 0.076 | 0.0071 | 3      |
|      |                 |                              | 0.31 | 0.42 | 0.47 | 0.33 | 0.25 |       |       |       |       |       |        | 0.0945 |
| NTSM | Verrucomicrobia | Xiphinematobacter            | 1    | 3    | 2    | 4    | 1    | 0.353 | 0.292 | 0.292 | 0.108 | 0.117 | 0.0094 | 4      |
|      |                 |                              | 0.00 | 0.00 | 0.00 | 0.00 | 0.00 |       |       |       |       |       |        | 0.0940 |
| NTSM | Chlorobi        | Ignavibacterium              | 0    | 0    | 0    | 0    | 0    | 0.000 | 0.000 | 0.000 | 0.000 | 1.000 | 0.0035 | 3      |
|      |                 |                              | 0.05 | 0.25 | 0.30 | 0.25 | 0.07 |       |       |       |       |       |        | 0.0940 |
| NTSM | Firmicutes      | Thermincola                  | 5    | 7    | 0    | 1    | 7    | 0.414 | 0.134 | 0.300 | 0.232 | 0.593 | 0.0068 | 3      |
|      |                 |                              | 0.31 | 0.10 | 0.16 | 0.14 | 0.34 |       |       |       |       |       |        | 0.0946 |
| NTSM | Proteobacteria  | Pseudomonas                  | 2    | 1    | 4    | 3    | 3    | 0.235 | 0.344 | 0.314 | 0.346 | 0.579 | 0.01   | 2      |
|      |                 |                              | 0.05 | 0.05 | 0.00 | 0.00 | 0.00 |       |       |       |       |       |        | 0.0965 |
| NTSM | Spirochaetae    | Spirochaeta_2                | 8    | 8    | 0    | 0    | 0    | 0.058 | 0.058 | 0.404 | 0.535 | 0.714 | 0.0104 | 4      |
|      |                 |                              | 0.20 | 0.22 | 0.49 | 0.60 | 0.42 |       |       |       |       |       |        | 0.0940 |
| NTSM | Actinobacteria  | Haloactinopolyspora          | 3    | 4    | 8    | 1    | 3    | 0.204 | 0.162 | 0.163 | 0.115 | 0.116 | 0.0048 | 3      |
|      |                 |                              | 0.29 | 0.23 | 0.49 | 0.58 | 0.35 |       |       |       |       |       |        | 0.0992 |
| NTSM | Proteobacteria  | Piscinibacter                | 8    | 7    | 9    | 6    | 1    | 0.240 | 0.117 | 0.113 | 0.148 | 0.161 | 0.0114 | 6      |

54 Table. S3 Spearman correlations between indicator genera and soil properties.

| Land use | Phylum           | genera                    | Depth           | SOC            | SEOC          | SEOC/SOC        | pH              | SM              | TN              | C/N            | NO <sub>3</sub> <sup>-</sup> -N | NH <sub>4</sub> <sup>+</sup> -N |
|----------|------------------|---------------------------|-----------------|----------------|---------------|-----------------|-----------------|-----------------|-----------------|----------------|---------------------------------|---------------------------------|
| CT       | NA               |                           |                 |                |               |                 |                 |                 |                 |                |                                 |                                 |
| NTNS     | Actinobacteria   | Aciditerrimonas           | -0.222          | 0.192          | 0.314         | 0.067           | -0.113          | -0.263          | 0.148           | 0.209          | 0.079                           | 0.022                           |
| NTNS     | Actinobacteria   | Angustibacter             | <b>-0.554**</b> | 0.463**        | 0.203         | <b>-0.515**</b> | <b>-0.516**</b> | -0.205          | <b>0.475**</b>  | <b>0.461*</b>  | 0.099                           | 0.137                           |
| NTNS     | Actinobacteria   | Aeromicrobium             | <b>-0.536**</b> | 0.271          | 0.311         | -0.135          | <b>-0.485**</b> | -0.206          | 0.29            | 0.246          | 0.131                           | 0.261                           |
| NTNS     | Actinobacteria   | Amycolatopsis             | -0.241          | 0.242          | 0.109         | -0.282          | <b>-0.422*</b>  | -0.171          | 0.226           | 0.29           | 0.297                           | 0.12                            |
| NTNS     | Chloroflexi      | Nitrolancea               | <b>-0.458*</b>  | 0.513**        | 0.04          | <b>-0.397*</b>  | <b>-0.43*</b>   | -0.088          | <b>0.439*</b>   | <b>0.543**</b> | 0.213                           | 0.141                           |
| NTNS     | Gemmatimonadetes | Gemmatimonas              | <b>-0.597**</b> | 0.402*         | <b>0.376*</b> | -0.165          | <b>-0.38*</b>   | -0.317          | <b>0.39*</b>    | 0.357          | 0.128                           | 0.31                            |
| NTNS     | Proteobacteria   | Caulobacter               | <b>-0.696**</b> | 0.671**        | 0.231         | <b>-0.508**</b> | <b>-0.453*</b>  | -0.087          | <b>0.659**</b>  | <b>0.648**</b> | 0.14                            | -0.018                          |
| NTNS     | Proteobacteria   | Phenylobacterium          | <b>-0.675**</b> | 0.4*           | 0.103         | -0.341          | <b>-0.456*</b>  | -0.284          | <b>0.521**</b>  | 0.357          | 0.303                           | 0.34                            |
| NTNS     | Proteobacteria   | Rhizomicrobium            | <b>-0.51**</b>  | 0.277          | 0.145         | -0.25           | -0.294          | -0.29           | 0.288           | 0.333          | 0.357                           | 0.251                           |
| NTNS     | Proteobacteria   | Pseudolabrys              | <b>-0.594**</b> | 0.39*          | 0.347         | -0.287          | <b>-0.471**</b> | -0.264          | <b>0.402*</b>   | <b>0.409*</b>  | 0.222                           | 0.301                           |
| NTNS     | Proteobacteria   | Rhodovastum               | <b>-0.509**</b> | 0.456*         | -0.042        | <b>-0.384*</b>  | <b>-0.423*</b>  | -0.197          | <b>0.466**</b>  | <b>0.384*</b>  | <b>0.374*</b>                   | -0.059                          |
| NTNS     | Proteobacteria   | Castellaniella            | -0.249          | 0.103          | 0.209         | 0.011           | -0.307          | <b>-0.485**</b> | 0.098           | 0.127          | -0.046                          | <b>0.387*</b>                   |
| NTNS     | Proteobacteria   | Dokdonella                | <b>-0.437*</b>  | 0.337          | 0.24          | -0.206          | <b>-0.552**</b> | -0.06           | <b>0.367*</b>   | 0.304          | -0.017                          | 0.283                           |
| NTNS     | Proteobacteria   | Mizugakiibacter           | <b>-0.436*</b>  | 0.248          | 0.313         | -0.203          | <b>-0.465**</b> | -0.192          | 0.212           | 0.352          | 0.142                           | 0.249                           |
| NTNS     | Planctomycetes   | AKYG587                   | <b>-0.444*</b>  | 0.354          | -0.128        | <b>-0.422*</b>  | <b>-0.386*</b>  | 0.099           | 0.344           | 0.378*         | 0.069                           | 0.069                           |
| NTNS     | Aenigmarchaeota  | Candidatus_Aenigmarchaeum | <b>0.57**</b>   | <b>-0.388*</b> | -0.24         | 0.068           | -0.062          | 0.127           | <b>-0.483**</b> | -0.173         | -0.091                          | 0.068                           |
| NTSM     | Actinobacteria   | Blastococcus              | <b>-0.383*</b>  | 0.425*         | 0.148         | -0.343          | -0.144          | -0.194          | <b>0.433*</b>   | 0.319          | -0.135                          | 0.221                           |
| NTSM     | Actinobacteria   | Modestobacter             | <b>-0.343</b>   | 0.334          | 0.193         | -0.253          | -0.254          | -0.204          | <b>0.385*</b>   | 0.251          | -0.134                          | 0.148                           |
| NTSM     | Actinobacteria   | Angustibacter             | <b>-0.039</b>   | 0.17           | 0.245         | 0.015           | 0.059           | -0.269          | 0.125           | 0.018          | -0.045                          | <b>0.418*</b>                   |
| NTSM     | Actinobacteria   | Cellulomonas              | <b>-0.417*</b>  | 0.477**        | 0.022         | <b>-0.463**</b> | -0.014          | -0.214          | <b>0.499**</b>  | 0.361          | -0.013                          | 0.299                           |
| NTSM     | Actinobacteria   | Aeromicrobium             | <b>-0.67**</b>  | 0.634**        | <b>0.459*</b> | <b>-0.391*</b>  | <b>-0.447*</b>  | -0.197          | <b>0.615**</b>  | <b>0.473**</b> | -0.016                          | 0.116                           |
| NTSM     | Actinobacteria   | Nocardioides              | <b>-0.466**</b> | 0.523**        | 0.171         | <b>-0.42*</b>   | -0.239          | -0.111          | <b>0.539**</b>  | 0.291          | -0.051                          | <b>0.373*</b>                   |
| NTSM     | Actinobacteria   | Pseudonocardia            | <b>-0.7**</b>   | 0.61**         | 0.272         | <b>-0.496**</b> | -0.125          | -0.18           | <b>0.631**</b>  | <b>0.486**</b> | -0.254                          | -0.001                          |

|      |                  |                    |          |         |        |          |         |         |         |         |          |         |
|------|------------------|--------------------|----------|---------|--------|----------|---------|---------|---------|---------|----------|---------|
| NTSM | Bacteroidetes    | Ohtaekwangia       | -0.821** | 0.786** | 0.125  | -0.726** | -0.183  | 0.101   | 0.812** | 0.601** | -0.43*   | 0.03    |
| NTSM | Bacteroidetes    | Flavisolibacter    | -0.453*  | 0.524** | 0.18   | -0.428*  | -0.276  | -0.08   | 0.578** | 0.416*  | -0.01    | 0.213   |
| NTSM | Bacteroidetes    | Flavitalea         | -0.469** | 0.563** | 0.023  | -0.558** | -0.163  | 0.02    | 0.653** | 0.403*  | -0.173   | 0.247   |
| NTSM | Bacteroidetes    | Parafilimonas      | -0.409*  | 0.519** | 0.122  | -0.451*  | -0.218  | -0.046  | 0.501** | 0.335   | -0.146   | 0.464** |
| NTSM | Bacteroidetes    | Parasegetibacter   | -0.441*  | 0.449*  | 0.177  | -0.363*  | -0.269  | -0.234  | 0.478** | 0.286   | -0.028   | 0.112   |
| NTSM | Bacteroidetes    | Segetibacter       | -0.591** | 0.47**  | 0.324  | -0.32    | -0.175  | -0.092  | 0.535** | 0.404*  | -0.216   | 0.288   |
| NTSM | Gemmatimonadetes | Gemmatimonas       | -0.467** | 0.619** | -0.08  | -0.605** | -0.262  | 0.027   | 0.658** | 0.452*  | -0.032   | 0.291   |
| NTSM | Proteobacteria   | Phenylobacterium   | -0.427*  | 0.589** | -0.163 | -0.631** | -0.246  | 0.158   | 0.598** | 0.392*  | -0.129   | 0.346   |
| NTSM | Proteobacteria   | Bradyrhizobium     | -0.785** | 0.809** | 0.139  | -0.719** | -0.175  | 0.104   | 0.819** | 0.669** | -0.446*  | 0.153   |
| NTSM | Proteobacteria   | Rhodoplanes        | -0.778** | 0.825** | 0.069  | -0.774** | -0.234  | 0.181   | 0.904** | 0.66**  | -0.427*  | 0.109   |
| NTSM | Proteobacteria   | Microvirga         | -0.403*  | 0.493** | 0.186  | -0.378*  | -0.193  | -0.082  | 0.576** | 0.263   | -0.114   | 0.252   |
| NTSM | Proteobacteria   | Labrys             | -0.47**  | 0.5**   | 0.182  | -0.427*  | -0.254  | 0.022   | 0.549** | 0.277   | -0.195   | 0.269   |
| NTSM | Proteobacteria   | Pseudolabrys       | -0.403*  | 0.476** | 0.077  | -0.418*  | -0.249  | -0.105  | 0.578** | 0.287   | -0.018   | 0.214   |
| NTSM | Proteobacteria   | Variibacter        | -0.743** | 0.801** | 0.062  | -0.737** | -0.147  | 0.138   | 0.793** | 0.681** | -0.439*  | 0.115   |
| NTSM | Proteobacteria   | Craurococcus       | -0.58**  | 0.531** | 0.288  | -0.401*  | -0.148  | -0.281  | 0.53**  | 0.362*  | -0.118   | 0.308   |
| NTSM | Proteobacteria   | Dongia             | -0.305   | 0.365*  | 0.031  | -0.345   | -0.239  | -0.265  | 0.35    | 0.28    | 0.006    | 0.335   |
| NTSM | Proteobacteria   | Elstera            | -0.406*  | 0.493** | 0.301  | -0.317   | -0.428* | -0.384* | 0.507** | 0.407*  | 0.166    | 0.416*  |
| NTSM | Proteobacteria   | Reyranella         | -0.694** | 0.775** | -0.023 | -0.767** | -0.254  | 0.178   | 0.813** | 0.614** | -0.317   | 0.111   |
| NTSM | Proteobacteria   | Acidovorax         | -0.639** | 0.62**  | 0.39*  | -0.388*  | -0.311  | -0.352  | 0.571** | 0.521** | -0.222   | 0.258   |
| NTSM | Proteobacteria   | Sorangium          | -0.521** | 0.465** | 0.164  | -0.372*  | -0.229  | -0.244  | 0.499** | 0.305   | -0.182   | 0.351   |
| NTSM | Acidobacteria    | Blastocatella      | -0.67**  | 0.749** | 0.053  | -0.711** | -0.145  | 0.152   | 0.793** | 0.561** | -0.41*   | 0.218   |
| NTSM | Actinobacteria   | Luedemannella      | -0.647** | 0.543** | 0.011  | -0.559** | 0.128   | 0.211   | 0.602** | 0.431*  | -0.535** | 0.028   |
| NTSM | Actinobacteria   | Microclunatus      | -0.8**   | 0.838** | -0.004 | -0.828** | 0.005   | 0.254   | 0.835** | 0.728** | -0.523** | 0.057   |
| NTSM | Planctomycetes   | AKYG587            | -0.642** | 0.609** | 0.088  | -0.583** | -0.033  | 0.111   | 0.581** | 0.472** | -0.495** | -0.014  |
| NTSM | Planctomycetes   | SM1A02             | -0.796** | 0.783** | 0.165  | -0.711** | -0.151  | 0.176   | 0.752** | 0.62**  | -0.391*  | 0.175   |
| NTSM | Planctomycetes   | planctomycete_LX80 | -0.254   | 0.223   | 0.194  | -0.087   | -0.195  | -0.12   | 0.255   | 0.133   | -0.067   | 0.312   |
| NTSM | Proteobacteria   | Azospirillum       | -0.464** | 0.481** | 0.236  | -0.341   | -0.124  | -0.245  | 0.488** | 0.288   | -0.154   | 0.28    |

|      |                 |                              |                 |                 |                |                 |        |                |                 |                 |                 |        |
|------|-----------------|------------------------------|-----------------|-----------------|----------------|-----------------|--------|----------------|-----------------|-----------------|-----------------|--------|
| NTSM | Proteobacteria  | Nannocystis                  | <b>-0.466**</b> | <b>0.5**</b>    | 0.081          | <b>-0.436*</b>  | -0.301 | -0.171         | <b>0.494**</b>  | <b>0.388*</b>   | -0.034          | -0.017 |
| NTSM | Proteobacteria  | Phaselicystis                | <b>-0.368*</b>  | <b>0.385*</b>   | -0.032         | <b>-0.399*</b>  | -0.12  | -0.087         | 0.349           | 0.319           | 0.04            | 0.086  |
| NTSM | Deferribacteres | Caldithrix                   | <b>0.642**</b>  | <b>-0.706**</b> | -0.057         | <b>0.705**</b>  | 0.185  | -0.36          | <b>-0.786**</b> | <b>-0.525**</b> | <b>0.371*</b>   | -0.112 |
| NTSM | Firmicutes      | Ruminiclostridium_1          | 0.315           | -0.257          | -0.123         | 0.222           | 0.04   | -0.36          | -0.305          | -0.268          | 0.054           | -0.065 |
| NTSM | Proteobacteria  | Anaeromyxobacter             | <b>0.634**</b>  | <b>-0.702**</b> | -0.207         | <b>0.604**</b>  | -0.006 | -0.299         | <b>-0.736**</b> | <b>-0.541**</b> | <b>0.496**</b>  | -0.15  |
| NTSM | Actinobacteria  | Iamia                        | <b>-0.656**</b> | <b>0.577**</b>  | -0.124         | <b>-0.672**</b> | 0.183  | <b>0.527**</b> | <b>0.591**</b>  | <b>0.503**</b>  | <b>-0.665**</b> | -0.211 |
| NTSM | Actinobacteria  | Frankia                      | <b>-0.59**</b>  | <b>0.605**</b>  | -0.179         | <b>-0.707**</b> | -0.058 | <b>0.487**</b> | <b>0.589**</b>  | <b>0.619**</b>  | <b>-0.448*</b>  | -0.152 |
| NTSM | Bacteroidetes   | Owenweeksia                  | <b>-0.545**</b> | <b>0.574**</b>  | -0.024         | <b>-0.593**</b> | 0.036  | 0.324          | <b>0.569**</b>  | <b>0.482**</b>  | <b>-0.399*</b>  | -0.018 |
| NTSM | Chloroflexi     | Anaerolinea                  | -0.247          | 0.321           | -0.333         | <b>-0.515**</b> | 0.208  | <b>0.618**</b> | 0.312           | 0.225           | <b>-0.407*</b>  | 0.103  |
| NTSM | Firmicutes      | Clostridium_sensu_stricto_13 | -0.361          | 0.261           | 0.127          | -0.248          | 0.162  | <b>0.421*</b>  | 0.311           | 0.263           | -0.219          | -0.185 |
| NTSM | Verrucomicrobia | Candidatus_Xiphinematobacter | <b>-0.674**</b> | <b>0.568**</b>  | <b>0.384*</b>  | <b>-0.411*</b>  | 0.021  | 0.165          | <b>0.522**</b>  | <b>0.435*</b>   | <b>-0.408*</b>  | 0.002  |
| NTSM | Chlorobi        | Ignavibacterium              | <b>0.521**</b>  | -0.241          | <b>-0.401*</b> | 0.097           | 0.112  | 0.249          | -0.201          | -0.305          | 0.146           | 0.224  |
| NTSM | Firmicutes      | Thermincola                  | 0.33            | -0.195          | -0.268         | 0.075           | 0.089  | 0.287          | -0.168          | -0.312          | -0.092          | -0.138 |
| NTSM | Proteobacteria  | Pseudomonas                  | <b>0.621**</b>  | <b>-0.539**</b> | -0.171         | <b>0.451*</b>   | 0.068  | -0.169         | <b>-0.523**</b> | <b>-0.478**</b> | <b>0.386*</b>   | 0.007  |
| NTSM | Spirochaetae    | Spirochaeta_2                | <b>0.73**</b>   | <b>-0.577**</b> | -0.306         | <b>0.458*</b>   | 0.083  | -0.159         | <b>-0.649**</b> | <b>-0.512**</b> | <b>0.403*</b>   | 0.336  |
| NTSM | Actinobacteria  | Haloactinopolyspora          | <b>-0.611**</b> | <b>0.54**</b>   | -0.117         | <b>-0.632**</b> | 0.181  | <b>0.431*</b>  | <b>0.524**</b>  | <b>0.571**</b>  | <b>-0.575**</b> | -0.278 |
| NTSM | Proteobacteria  | Piscinibacter                | <b>-0.664**</b> | <b>0.671**</b>  | -0.105         | <b>-0.717**</b> | 0.069  | <b>0.49**</b>  | <b>0.653**</b>  | <b>0.668**</b>  | <b>-0.616**</b> | -0.135 |

55 SOC = soil organic carbon; SEOC = salt-extractable organic carbon; SEOC/SOC = ratio of SEOC to SOC; SM = soil moisture; TN = total nitrogen  
 56 content; C/N = ratio of SOC to TN; NH<sub>4</sub><sup>+</sup>-N = ammonium nitrogen; NO<sub>3</sub><sup>-</sup>-N = nitrate nitrogen. \* means p < 0.05, \*\* means p < 0.01, \*\*\* means p <  
 57 0.0001. Red number means significant negative correlation and blue number means significant positive correlation.

58

59 Table S4. The relative abundances of dominant phyla at different depths within three disturbance practices.

| Phylum           | Tillage | Soil depth(cm) |              |             |             |              |              |              |             |              |             |
|------------------|---------|----------------|--------------|-------------|-------------|--------------|--------------|--------------|-------------|--------------|-------------|
|                  |         | 0-10           | 10-20        | 20-40       | 40-60       | 60-90        | 90-120       | 120-150      | 150-200     | 200-250      | 250-300     |
| Acidobacteria    | CT      | 10.97±2.42a    | 11.25±2.25a  | 10.30±3.12a | 11.24±1.46a | 7.94±2.63a   | 8.53±0.56a   | 10.26±1.81b  | 10.21±1.42a | 9.94±0.62a   | 10.62±0.55a |
|                  | NTNS    | 11.25±2.39a    | 14.72±1.73a  | 13.33±1.27a | 9.66±0.89a  | 8.90±2.61a   | 9.06±2.03a   | 6.46±2.11a   | 9.16±2.28a  | 7.02±3.10a   | 10.62±1.37a |
|                  | NTSM    | 11.22±4.10a    | 16.39±3.96a  | 13.29±1.20a | 11.23±0.86a | 9.58±0.83a   | 8.71±0.82a   | 9.95±0.67b   | 8.89±0.19a  | 9.45±0.92a   | 9.94±0.53a  |
|                  |         | BC             | D            | CD          | ABC         | A            | A            | A            | AB          | A            | ABC         |
| Actinobacteria   | CT      | 16.31±4.30a    | 25.59±10.25a | 36.75±8.40a | 33.29±7.31a | 32.40±14.77a | 39.85±4.54a  | 23.87±13.38a | 10.73±4.61a | 8.79±3.48a   | 14.59±6.34a |
|                  | NTNS    | 11.21±1.05a    | 14.14±4.86a  | 21.10±3.69a | 31.95±1.76a | 28.07±7.97a  | 26.81±10.20a | 18.93±8.40a  | 12.45±5.72a | 6.86±0.71a   | 10.98±4.99a |
|                  | NTSM    | 16.45±4.70a    | 15.22±0.99a  | 30.34±1.66a | 27.92±1.27a | 34.74±4.81a  | 34.84±3.96a  | 24.63±4.89a  | 12.89±8.00a | 5.37±0.42a   | 7.51±0.78a  |
|                  |         | BC             | CD           | E           | E           | E            | E            | B            | AB          | A            | F           |
| Bacteroidetes    | CT      | 7.71±2.10a     | 4.59±1.00a   | 2.20±0.94a  | 3.35±1.15a  | 5.57±6.84a   | 2.36±1.63a   | 1.77±1.08a   | 1.57±1.10a  | 0.78±0.20a   | 1.58±0.32a  |
|                  | NTNS    | 12.72±4.35a    | 5.61±1.35a   | 4.58±2.47a  | 3.44±1.27a  | 11.30±14.44a | 9.12±10.07a  | 7.25±5.20a   | 1.88±0.16a  | 13.68±20.79a | 1.55±0.55a  |
|                  | NTSM    | 8.69±0.52a     | 6.62±1.02a   | 3.45±1.07a  | 2.88±0.31a  | 2.15±0.74a   | 3.51±1.46a   | 2.29±1.58a   | 3.79±2.59a  | 2.13±1.68a   | 2.73±1.29a  |
|                  |         | C              | BC           | AB          | AB          | AB           | AB           | AB           | AB          | AB           | A           |
| Chloroflexi      | CT      | 4.44±0.65a     | 8.87±1.22a   | 8.56±1.97a  | 11.52±0.99a | 7.58±3.70a   | 12.06±2.62a  | 14.99±4.28ab | 18.48±4.36a | 15.02±1.82a  | 15.25±1.81a |
|                  | NTNS    | 5.70±0.90a     | 9.75±0.79a   | 9.99±1.50a  | 9.91±2.04a  | 8.11±3.30a   | 9.14±2.01a   | 10.80±2.25a  | 15.81±1.92a | 12.75±7.97a  | 15.01±2.04a |
|                  | NTSM    | 5.30±0.83a     | 8.63±1.11a   | 7.82±2.38a  | 10.88±1.07a | 9.11±1.05a   | 12.61±2.34a  | 16.89±1.40b  | 19.00±1.07a | 16.04±2.28a  | 13.26±2.22a |
|                  |         | A              | BC           | BC          | C           | B            | C            | D            | E           | D            | D           |
| Firmicutes       | CT      | 0.22±0.04a     | 0.65±0.25a   | 0.68±0.23a  | 0.41±0.15a  | 2.13±2.74a   | 0.84±0.34a   | 0.69±0.31a   | 0.39±0.31a  | 1.54±1.63a   | 1.18±0.50a  |
|                  | NTNS    | 1.77±2.43a     | 0.38±0.10a   | 0.77±0.63a  | 1.14±1.43a  | 3.96±5.65a   | 3.14±3.38a   | 4.24±5.72a   | 0.62±0.42a  | 4.71±5.95a   | 0.60±0.38a  |
|                  | NTSM    | 0.38±0.11a     | 0.48±0.12a   | 0.64±0.24a  | 0.38±0.06a  | 1.18±0.82a   | 1.50±0.36a   | 1.42±0.52a   | 1.23±0.59a  | 1.75±1.65a   | 1.31±0.59a  |
|                  |         | A              | A            | AB          | A           | AB           | AB           | AB           | AB          | B            | AB          |
| Gemmatimonadetes | CT      | 6.72±0.07a     | 7.11±0.33a   | 6.03±0.86a  | 5.72±0.40a  | 5.63±1.79a   | 5.89±0.98a   | 6.15±0.27a   | 6.29±1.04a  | 4.42±0.97a   | 3.99±0.54a  |
|                  | NTNS    | 6.65±1.75a     | 6.11±1.08a   | 5.85±0.48a  | 6.13±0.75a  | 5.34±2.21a   | 5.72±1.53a   | 6.08±1.74a   | 5.62±1.19a  | 3.79±1.23a   | 4.43±0.46a  |

|                 |      |             |             |             |             |                |                |             |                |             |             |
|-----------------|------|-------------|-------------|-------------|-------------|----------------|----------------|-------------|----------------|-------------|-------------|
|                 | NTSM | 5.68±0.12a  | 6.10±0.37a  | 5.87±0.24a  | 6.67±0.72a  | 5.58±1.05a     | 5.62±1.21a     | 6.26±0.15a  | 5.29±0.59a     | 3.76±0.50a  | 3.83±0.73a  |
|                 |      | A           | A           | A           | A           | A              | A              | A           | A              | B           | B           |
| Latescibacteria | CT   | 0.47±0.35a  | 0.70±0.15a  | 1.50±0.66a  | 1.92±0.16a  | 1.58±1.17a     | 2.14±0.81a     | 2.62±0.99a  | 1.92±1.03a     | 1.37±0.34b  | 1.05±0.04a  |
|                 | NTNS | 0.47±0.05a  | 1.52±0.13b  | 2.00±0.78a  | 1.70±0.43a  | 1.53±0.81a     | 1.43±0.19a     | 1.25±0.72a  | 1.41±0.28a     | 0.58±0.33a  | 0.96±0.18a  |
|                 | NTSM | 0.39±0.16a  | 0.93±0.22a  | 1.73±0.31a  | 2.25±0.41a  | 2.25±0.71a     | 2.38±1.08a     | 3.32±2.31a  | 1.50±0.56a     | 0.82±0.16ab | 1.03±0.39a  |
|                 |      | A           | BC          | D           | D           | D              | D              | D           | CD             | B           | BC          |
| Microgenomates  | CT   | 0.15±0.13a  | 0.34±0.27a  | 0.25±0.15a  | 0.42±0.29a  | 0.18±0.07a     | 0.50±0.41a     | 1.65±1.45a  | 2.28±1.79a     | 2.57±0.85a  | 3.15±0.33a  |
|                 | NTNS | 1.11±1.19a  | 0.56±0.27a  | 0.54±0.10a  | 0.25±0.14a  | 0.25±0.17a     | 0.47±0.34a     | 0.75±0.70a  | 2.18±0.53a     | 3.93±3.67a  | 3.77±1.33a  |
|                 | NTSM | 1.17±0.83a  | 0.85±0.21a  | 0.48±0.20a  | 0.60±0.12a  | 0.40±0.14a     | 0.60±0.32a     | 1.10±0.71a  | 2.70±0.77a     | 6.04±3.86a  | 4.01±0.49a  |
|                 |      | AB          | AB          | AB          | AB          | A              | AB             | B           | C              | D           | D           |
| Nitrospirae     | CT   | 1.45±0.42a  | 2.12±0.10a  | 6.56±2.39a  | 7.27±2.40a  | 6.45±1.95a     | 6.53±0.93a     | 8.37±2.48a  | 8.95±1.14a     | 10.94±2.01a | 8.23±1.64a  |
|                 | NTNS | 1.68±0.42a  | 3.49±0.30b  | 5.44±2.79a  | 5.98±1.79a  | 5.58±2.52a     | 5.49±2.08a     | 6.30±2.51a  | 8.77±1.39a     | 6.37±3.74a  | 9.44±1.77a  |
|                 | NTSM | 1.50±0.12a  | 2.79±0.59ab | 7.18±0.76a  | 7.72±0.87a  | 6.33±1.32a     | 5.99±0.69a     | 7.86±1.61a  | 9.55±1.86a     | 10.50±0.77a | 9.66±2.27a  |
|                 |      | A           | B           | C           | C           | C              | C              | D           | D              | D           | D           |
| Parcubacteria   | CT   | 0.41±0.21a  | 0.50±0.06a  | 0.26±0.11a  | 0.40±0.13a  | 0.42±0.14a     | 0.55±0.10a     | 1.34±0.86a  | 4.58±4.11a     | 8.40±0.86a  | 7.68±2.24a  |
|                 | NTNS | 1.38±0.89a  | 0.82±0.30ab | 0.52±0.09b  | 0.49±0.22a  | 0.40±0.24a     | 0.38±0.21a     | 3.23±4.78a  | 3.71±2.12a     | 5.57±4.43a  | 6.60±0.70a  |
|                 | NTSM | 1.04±0.14a  | 1.06±0.30b  | 0.43±0.15ab | 0.53±0.22a  | 0.38±0.02a     | 0.56±0.16a     | 0.68±0.29a  | 5.07±3.23a     | 9.37±1.25a  | 4.75±1.92a  |
|                 |      | AB          | AB          | A           | AB          | A              | AB             | B           | C              | D           | D           |
| Planctomycetes  | CT   | 3.59±2.72a  | 2.71±0.83a  | 1.51±0.30a  | 2.31±0.92a  | 1.09±0.49a     | 1.41±0.56a     | 1.99±0.25a  | 2.01±0.34a     | 1.76±0.21a  | 2.13±0.31a  |
|                 | NTNS | 4.52±2.72a  | 7.95±2.24b  | 3.48±1.18b  | 1.93±0.52a  | 1.62±0.82a     | 1.83±1.39a     | 1.66±0.89a  | 3.09±0.39b     | 2.16±1.47a  | 2.86±0.96a  |
|                 | NTSM | 5.14±0.41a  | 6.50±1.04b  | 2.19±0.52ab | 2.27±0.52a  | 1.18±0.45a     | 1.28±0.34a     | 1.74±0.45a  | 2.15±0.34a     | 2.28±0.42a  | 2.19±0.77a  |
|                 |      | C           | D           | BC          | BC          | A              | AB             | ABC         | C              | ABC         | C           |
| Proteobacteria  | CT   | 42.48±8.42a | 31.01±7.20a | 21.70±4.94a | 17.84±2.00a | 25.04 ± 13.62a | 15.23±0.20a    | 18.41±1.18a | 22.01±2.86a    | 23.32±6.01a | 18.93±3.75a |
|                 | NTNS | 33.50±2.43a | 28.43±0.73a | 26.56±6.21a | 22.26±4.25a | 20.17±2.38a    | 20.42±3.04b    | 27.44±4.76b | 28.36 ± 11.14a | 21.46±0.93a | 18.58±0.86a |
|                 | NTSM | 35.85±1.47a | 27.79±1.87a | 21.62±2.49a | 20.94±0.10a | 22.32±6.42a    | 17.21 ± 0.65ab | 16.33±0.95a | 18.61±1.27a    | 19.48±2.98a | 26.09±2.82b |
|                 |      | D           | C           | B           | AB          | AB             | A              | AB          | B              | AB          | AB          |



|                      |      |            |            |             |            |            |            |            |            |            |            |
|----------------------|------|------------|------------|-------------|------------|------------|------------|------------|------------|------------|------------|
| Saccharibacter<br>ia | CT   | 0.70±0.33a | 0.91±1.14a | 0.20±0.14a  | 0.13±0.06a | 0.23±0.14a | 0.22±0.09a | 0.32±0.23a | 0.21±0.12a | 0.20±0.12a | 0.42±0.22a |
|                      | NTNS | 1.45±0.58a | 0.27±0.15a | 0.28±0.11a  | 0.32±0.25a | 0.25±0.12a | 0.34±0.38a | 0.25±0.02a | 0.10±0.04a | 0.45±0.26a | 0.42±0.16a |
|                      | NTSM | 1.59±1.39a | 0.65±0.28a | 0.26±0.11a  | 0.23±0.11a | 0.25±0.09a | 0.28±0.08a | 0.11±0.08a | 0.19±0.01a | 1.67±1.82a | 1.30±1.14a |
|                      | E    |            | BCD        | AB          | AB         | AB         | ABC        | AB         | A          | CD         | D          |
| Verrucomicrobi<br>a  | CT   | 2.40±1.80a | 1.34±0.21a | 1.16±0.11a  | 1.56±0.64a | 0.81±0.10a | 1.04±0.24a | 1.01±0.35a | 0.84±0.08a | 0.46±0.16a | 1.18±0.50a |
|                      | NTNS | 3.22±1.20a | 2.52±0.34b | 2.28±0.40b  | 1.55±0.39a | 1.17±0.62a | 1.15±0.57a | 0.90±0.36a | 0.93±0.29a | 0.68±0.37a | 1.69±0.61a |
|                      | NTSM | 3.00±0.56a | 2.74±0.41b | 1.67±0.33ab | 1.42±0.09a | 0.83±0.06a | 0.98±0.10a | 0.74±0.31a | 0.83±0.25a | 0.49±0.03a | 1.10±0.61a |
|                      | E    |            | D          | CD          | C          | B          | B          | AB         | AB         | A          | BC         |

Different letters indicate significant differences at P<0.05.

60

61

62 Table S5 Rooting depths of crops under different tillage managements. Only crops with more than two tillage managements are retained.

| ID | Reference           | Crop      | Tillage Practices | Straw mulching | Root depth (cm) | Location               | Date     |
|----|---------------------|-----------|-------------------|----------------|-----------------|------------------------|----------|
| 1  | Bunna et al., 2011  | Mungbean  | Conventional      | No             | 15.7            | Takeo, Cambodia        | 2010, 1  |
|    |                     | Mungbean  | Conventional      | Yes            | 17              | Takeo, Cambodia        | 2010, 1  |
|    |                     | Mungbean  | Conventional      | Yes            | 16              | Takeo, Cambodia        | 2010, 1  |
|    |                     | Mungbean  | Conventional      | Yes            | 16.8            | Takeo, Cambodia        | 2010, 1  |
|    |                     | Mungbean  | Conventional      | No             | 17              | Kampong Thom, Cambodia | 2009, 12 |
|    |                     | Mungbean  | Conventional      | Yes            | 20              | Kampong Thom, Cambodia | 2009, 12 |
|    |                     | Mungbean  | Conventional      | Yes            | 19              | Kampong Thom, Cambodia | 2009, 12 |
|    |                     | Mungbean  | Conventional      | Yes            | 20              | Kampong Thom, Cambodia | 2009, 12 |
|    |                     | Mungbean  | Conventional      | No             | 12.9            | CARDI in Cambodia      | 2010, 2  |
|    |                     | Mungbean  | Conventional      | Yes            | 13.2            | CARDI in Cambodia      | 2010, 2  |
|    |                     | Mungbean  | Conventional      | Yes            | 14.9            | CARDI in Cambodia      | 2010, 2  |
|    |                     | Mungbean  | Conventional      | Yes            | 15.7            | CARDI in Cambodia      | 2010, 2  |
| 2  | Kemper et al., 2011 | Wheat     | No-tillage        | No             | 112             | Mandan, ND             | 1988     |
|    |                     | Wheat     | Conventional      | No             | 87              | Mandan, ND             | 1988     |
|    |                     | Wheat     | No-tillage        | No             | 89              | Mandan, ND             | 1989     |
|    |                     | Wheat     | Conventional      | No             | 69              | Mandan, ND             | 1989     |
|    |                     | Wheat     | No-tillage        | No             | 76              | Mandan, ND             | 1990     |
|    |                     | Wheat     | Conventional      | No             | 66              | Mandan, ND             | 1990     |
|    |                     | Sunflower | No-tillage        | No             | 193             | Mandan, ND             | 1992     |
|    |                     | Sunflower | Conventional      | No             | 143             | Mandan, ND             | 1992     |
|    |                     | Wheat     | No-tillage        | No             | 150             | Oshkosh, WI            | 2008     |
|    |                     | Wheat     | Conventional      | No             | 75              | Oshkosh, WI            | 2008     |
|    |                     | Corn      | No-tillage        | No             | 142             | Oshkosh, WI            | 2009     |
|    |                     | Corn      | Conventional      | No             | 74              | Oshkosh, WI            | 2009     |

|   |                      |           |              |    |     |                       |               |
|---|----------------------|-----------|--------------|----|-----|-----------------------|---------------|
|   |                      | Corn      | No-tillage   | No | 104 | Omro, WI              | 2009          |
|   |                      | Corn      | Conventional | No | 56  | Omro, WI              | 2009          |
|   |                      | Corn      | No-tillage   | No | 122 | Oshkosh, WI           | 2009          |
|   |                      | Corn      | Conventional | No | 64  | Oshkosh, WI           | 2009          |
|   |                      | Corn      | No-tillage   | No | 131 | Oshkosh, WI           | 2009          |
|   |                      | Corn      | Conventional | No | 67  | Oshkosh, WI           | 2009          |
|   |                      | Corn      | Conventional | No | 58  | Wisconsin             | 2009          |
|   |                      | Corn      | Conventional | No | 69  | Wisconsin             | 2009          |
|   |                      | Corn      | No-tillage   | No | 122 | Wisconsin             | 2009          |
|   |                      | Corn      | No-tillage   | No | 132 | Wisconsin             | 2009          |
| 3 | Merrill et al., 2002 | Sunflower | No-tillage   | No | 161 | Morton County, ND     | 1995          |
|   |                      | Sunflower | No-tillage   | No | 131 | Morton County, ND     | 1996          |
|   |                      | Sunflower | No-tillage   | No | 144 | Morton County, ND     | 1997          |
|   |                      | Wheat     | No-tillage   | No | 126 | Morton County, ND     | 1995          |
|   |                      | Wheat     | No-tillage   | No | 125 | Morton County, ND     | 1996          |
|   |                      | Wheat     | No-tillage   | No | 117 | Morton County, ND     | 1997          |
|   |                      | Soybean   | No-tillage   | No | 109 | Morton County, ND     | 1995          |
|   |                      | Soybean   | No-tillage   | No | 103 | Morton County, ND     | 1996          |
|   |                      | Soybean   | No-tillage   | No | 86  | Morton County, ND     | 1997          |
| 4 | Turman et al., 1995  | Soybean   | Conventional | No | 80  | Portageville, MO, USA | 1992, 14 May  |
|   |                      | Soybean   | Conventional | No | 66  | Portageville, MO, USA | 1992, 15 June |
|   |                      | Soybean   | Conventional | No | 93  | Portageville, MO, USA | 1992, 7 July  |
|   |                      | Soybean   | Conventional | No | 49  | Portageville, MO, USA | 1993, 12 May  |
|   |                      | Soybean   | Conventional | No | 41  | Portageville, MO, USA | 1993, 2 June  |
|   |                      | Soybean   | Conventional | No | 53  | Portageville, MO, USA | 1993, 21 June |
|   |                      | Soybean   | No-tillage   | No | 76  | Portageville, MO, USA | 1992, 14 May  |

|   |                    |            |              |    |                       |                 |                |
|---|--------------------|------------|--------------|----|-----------------------|-----------------|----------------|
|   | Soybean            | No-tillage | No           | 87 | Portageville, MO, USA | 1992, 15 June   |                |
|   | Soybean            | No-tillage | No           | 84 | Portageville, MO, USA | 1992, 7 July    |                |
|   | Soybean            | No-tillage | No           | 45 | Portageville, MO, USA | 1993, 12 May    |                |
|   | Soybean            | No-tillage | No           | 32 | Portageville, MO, USA | 1993, 2 June    |                |
|   | Soybean            | No-tillage | No           | 40 | Portageville, MO, USA | 1993, 21 June   |                |
| 5 | Dwyer et al., 1996 | Corn       | Conventional | No | 80.6                  | Ottawa, Ontario | 1988           |
|   |                    | Corn       | Conventional | No | 101.3                 | Ottawa, Ontario | 1989           |
|   |                    | Corn       | No-tillage   | No | 70.6                  | Ottawa, Ontario | 1988           |
|   |                    | Corn       | No-tillage   | No | 91.3                  | Ottawa, Ontario | 1989           |
|   |                    | Corn       | Conventional | No | 90.6                  | Ottawa, Ontario | NA (Clay loam) |
|   |                    | Corn       | Conventional | No | 91.3                  | Ottawa, Ontario | NA (Sany loam) |
|   |                    | Corn       | No-tillage   | No | 89.4                  | Ottawa, Ontario | NA (Clay loam) |
|   |                    | Corn       | No-tillage   | No | 72.5                  | Ottawa, Ontario | NA (Sany loam) |
| 6 | Dwyer et al., 1988 | Corn       | Conventional | No | 90                    | Ottawa, Ontario | 1982           |
|   |                    | Corn       | Conventional | No | 90                    | Ottawa, Ontario | 1982           |
|   |                    | Corn       | Conventional | No | 90                    | Ottawa, Ontario | 1982           |
|   |                    | Corn       | Conventional | No | 90                    | Ottawa, Ontario | 1982           |
|   |                    | Corn       | Conventional | No | 115                   | Ottawa, Ontario | 1983           |
|   |                    | Corn       | Conventional | No | 98                    | Ottawa, Ontario | 1983           |
|   |                    | Corn       | Conventional | No | 90                    | Ottawa, Ontario | 1983           |
|   |                    | Corn       | Conventional | No | 99                    | Ottawa, Ontario | 1983           |
|   |                    | Corn       | Conventional | No | 90                    | Ottawa, Ontario | 1984           |
|   |                    | Corn       | Conventional | No | 86                    | Ottawa, Ontario | 1984           |
|   |                    | Corn       | Conventional | No | 75                    | Ottawa, Ontario | 1984           |
|   |                    | Corn       | Conventional | No | 90                    | Ottawa, Ontario | 1984           |
|   |                    | Soybean    | Conventional | No | 75                    | Ottawa, Ontario | 1982           |
|   |                    | Soybean    | Conventional | No | 80                    | Ottawa, Ontario | 1982           |

|         |              |    |    |                 |      |
|---------|--------------|----|----|-----------------|------|
| Soybean | Conventional | No | 69 | Ottawa, Ontario | 1982 |
| Soybean | Conventional | No | 75 | Ottawa, Ontario | 1982 |
| Soybean | Conventional | No | 75 | Ottawa, Ontario | 1983 |
| Soybean | Conventional | No | 75 | Ottawa, Ontario | 1983 |
| Soybean | Conventional | No | 74 | Ottawa, Ontario | 1983 |
| Soybean | Conventional | No | 94 | Ottawa, Ontario | 1983 |
| Soybean | Conventional | No | 70 | Ottawa, Ontario | 1984 |
| Soybean | Conventional | No | 77 | Ottawa, Ontario | 1984 |
| Soybean | Conventional | No | 68 | Ottawa, Ontario | 1984 |
| Soybean | Conventional | No | 70 | Ottawa, Ontario | 1984 |

---

63  
64

65 **References**

- 66 1. Bunna, S., Sinath, P., Makara, O., Mitchell, J. & Fukai, S. Effects of straw  
67 mulch on mungbean yield in rice fields with strongly compacted soils. *Field*  
68 *Crops Res.* **124**, 295–301 (2011).
- 69 2. Kemper, W. D., Schneider, N. N. & Sinclair, T. R. No-till can increase earthworm  
70 populations and rooting depths. *J. Soil Water Conserv.* **66**, 13A-17A (2011).
- 71 3. Merrill, S. D., Tanaka, D. L. & Hanson, J. D. Root length growth of eight crop  
72 species in Haplustoll soils. *Soil Sci. Soc. Am. J.* **66**, 913–923 (2002).
- 73 4. Turman, P., Wiebold, W., Wrather, J. & Tracy, P. Effect of planting date and  
74 tillage system on soybean root growth. *J. Plant Nutr.* **18**, 2579–2594 (1995).
- 75 5. Dwyer, L. *et al.* Root mass distribution under conventional and conservation  
76 tillage. *Can. J. Soil Sci.* **76**, 23–28 (1996).
- 77 **6.** Dwyer, L., Stewart, D. & Balchin, D. Rooting characteristics of corn, soybeans  
78 and barley as a function of available water and soil physical characteristics.  
79 *Can. J. Soil Sci.* **68**, 121–132 (1988).
